1           **Colibactin DNA damage signature indicates causative role in colorectal cancer**

2

3 Paulina J. Dziubańska-Kusibab<sup>1†</sup>, Hilmar Berger<sup>1†</sup>, Federica Battistini<sup>2</sup>, Britta A. M. Bouwman<sup>3</sup>,  
4 Amina Iftekhar<sup>1</sup>, Riku Katainen<sup>4</sup>, Nicola Crosetto<sup>3</sup>, Modesto Orozco<sup>2,5</sup>, Lauri A. Aaltonen<sup>4</sup>, and  
5 Thomas F. Meyer<sup>1,\*</sup>

6 † Shared first authors

7

8 <sup>1</sup> Department of Molecular Biology, Max Planck Institute for Infection Biology, 10117 Berlin,  
9 Germany

10 <sup>2</sup> Institute for Research in Biomedicine (IRB Barcelona). The Barcelona Institute of Science and  
11 Technology, 08028 Barcelona, Spain

12 <sup>3</sup> Science for Life Laboratory, Department of Medical Biochemistry and Biophysics, Karolinska  
13 Institutet, 17165 Stockholm, Sweden

14 <sup>4</sup> Applied Tumor Genomics Research Program and Department of Medical and Clinical  
15 Genetics, Medicum, University of Helsinki, 00014 Helsinki, Finland

16 <sup>5</sup> Department of Biochemistry and Biomedicine, University of Barcelona, Barcelona, Spain

17

18 \* Corresponding author:

19 Prof. Thomas F. Meyer  
20 Department of Molecular Biology  
21 Max Planck Institute for Infection Biology  
22 Charitéplatz 1  
23 10117 Berlin  
24 Germany  
25 Email: [tfm@mpiib-berlin.mpg.de](mailto:tfm@mpiib-berlin.mpg.de)  
26

27 **Abstract**

28 Colibactin, a potent genotoxin of *Escherichia coli*, causes DNA double strand breaks (DSBs) in human  
29 cells. We investigated if colibactin creates a particular DNA damage signature in infected cells by  
30 identifying DSBs in colon cells after infection with *pks+* *E.coli*. Interestingly, genomic contexts of DSBs  
31 were enriched for AT-rich penta-/hexameric sequence motifs, exhibiting a particularly narrow minor  
32 groove width and extremely negative electrostatic potential. This corresponded with the binding  
33 characteristics of colibactin to double-stranded DNA, as elucidated by docking and molecular dynamics  
34 simulations. A survey of somatic mutations at the colibactin target sites of several thousand cancer  
35 genomes revealed significant enrichment of the identified motifs in colorectal cancers. Our work  
36 provides direct evidence for a role of colibactin in the etiology of human cancer.

37 **One sentence summary:** We identify a mutational signature of colibactin, which is significantly  
38 enriched in human colorectal cancers.

39

40

41 The mucosal epithelium is a preferred target of damage by chronic bacterial infections and associated  
42 toxins. Not surprisingly, most cancers originate from this tissue. Several infectious agents have been  
43 implicated in human cancers, with *Helicobacter pylori* representing the prototype of a cancer-inducing  
44 bacterium. Yet, unlike for infections with tumor viruses, which deposit telltale transforming genes in  
45 infected cells, for bacterial pathogens compelling evidence of a carcinogenic function is missing due to  
46 the lack of specific signatures of past infections in the emerging cancer genomes. Nonetheless, a  
47 broader role of bacterial pathogens in human carcinogenesis is highly suggestive.

48 In humans, several bacterial species have been attributed to a potential role in colorectal cancer (CRC),  
49 including *Fusobacterium nucleatum*<sup>1</sup> and colibactin-producing strains of *E. coli*<sup>2,3</sup>. Mechanistic analyses  
50 indicated distinct cancer-promoting mechanisms elicited by these bacteria, including the activation of  
51 inflammatory and growth-promoting signaling pathways as well as the induction of DNA damage<sup>4</sup>. In  
52 particular, colibactin toxin, a secondary metabolite produced by strains of the B2 phylogenetic group  
53 of *E. coli*, has long been known to possess DNA damaging ability. In 2006, Nougayrède and  
54 collaborators described the 54 kilobase *pks* genomic island that encodes this polyketide-peptide hybrid  
55 and showed that *pks*-harboring *E. coli* induce double-strand breaks (DSBs) in host cells and activate the  
56 G2-M DNA damage checkpoint pathway<sup>5</sup>. The recent discovery of a cyclopropane ring, characteristic  
57 of DNA alkylating agents, led to the isolation of colibactin-dependent N-3 adenine adducts from host  
58 DNA<sup>6</sup>. This observation was followed by the resolution of colibactin's mature structure as a highly  
59 symmetrical molecule, containing identical cyclopropane warheads at each end, which can give rise to  
60 DNA cross-links<sup>7</sup>. Yet, it is unclear if colibactin's mode of action generates a specific signature that is  
61 retrievable in cancers from tissues potentially exposed to respective *E. coli* infections.

62 To determine a potential preference of colibactin action for specific sites in host cell DNA, we began  
63 by globally defining the occurrence of DSBs upon infection of colon derived cells with *pks+* *E. coli*. To  
64 this end, we applied 'Breaks Labeling In Situ and Sequencing' (BLISS), which allows the detection of the

65 exact sites of DSBs in fixed host cells<sup>8</sup>. The resulting next-generation sequencing (NGS) data and  
66 computational analyses revealed a highly specific DNA damage signature, involving AT-rich sequence  
67 patterns associated with extreme shape characteristics, which was confirmed by *in silico* modelling of  
68 the colibactin interaction with DNA. By using this information for a stringent search of a mutational  
69 signature of colibactin in human cancer genome data, we establish a role of colibactin in the cause of  
70 human colorectal cancer and possibly additional cancer types.

71

## 72 **An unbiased sequencing approach to detect colibactin-induced DSB patterns**

73 To confirm colibactin-induced damage, we infected the human colorectal adenocarcinoma cell line  
74 Caco-2 with *pks+* *E. coli* at MOI 20 for 3 hours. Fluorescence immunohistochemistry showed that cells  
75 infected with the wild-type bacteria (*pks+*) were positive for the DNA damage marker  $\gamma$ H2AX, while  
76 cells infected with the *clbR* deletion mutant (*pks-*), in which colibactin synthesis is restricted<sup>9</sup>, were  
77 not (Fig. 1A). To specifically gain insight into colibactin-induced DSBs and the DNA sequences at which  
78 they occur, BLISS was applied to Caco-2 cells infected with WT M1/5 (*pks+*) and mutant  $\Delta$ *clbR* M1/5  
79 (*pks-*) *E. coli*. Untreated cells and cells treated with the DSB-inducing chemical agent etoposide served  
80 as controls (Fig. 1B). BLISS enables unbiased identification of host cell DSBs on a genome-wide scale at  
81 nucleotide resolution, based on the amplification of tagged DSBs by *in vitro* transcription. After  
82 infection, cells were fixed and the preserved DSBs were blunted *in situ* to allow ligation of specific  
83 double-stranded adapters containing a barcode, a unique molecular identifier (UMI), an RA5 Illumina  
84 sequencing adapter and a T7 promoter sequence (Fig. 1B). After *in vitro* transcription, NGS libraries  
85 were generated from the produced RNA and sequenced in single-end mode. The included UMIs are  
86 used for PCR duplicate removal, while the sample barcodes allow for pooling of different samples prior  
87 to the transcription reaction. The raw reads served to determine the genomic positions of DSBs as well  
88 as the counts of unique cleavage events using an established analysis pipeline (see Methods). To  
89 confirm that our method captured known DSB patterns, we examined the breakpoint density around

90 transcription start sites (TSS), which are reportedly susceptible to breaks induced by etoposide <sup>8,10,11</sup>.  
91 An increase in breakpoint counts around TSSs in our etoposide control was indeed observed (Fig. 1C),  
92 indicating the reliability of BLISS as an approach to define colibactin-induced DSB patterns. Next, we  
93 performed Locus Overlap Analysis (LOLA) to determine whether the identified DSBs were enriched in  
94 particular genomic regions <sup>12</sup>. Interestingly, unlike the DSBs induced by treatment with etoposide or  
95 the DSBs observed in the negative controls, those induced in the *pks+* *E. coli* condition did not show  
96 strong correlation with any known particular genomic regions (Fig. 1D).

97

### 98 **Colibactin damages DNA preferentially in specific AT-rich motifs**

99 Next, we asked whether we could identify any particular sequence pattern around the identified DSBs.  
100 We thus analyzed nucleotide sequence content of different length stretches around all identified DSBs  
101 and compared them between the different treatments. We found that DSBs in cells exposed to *pks+*  
102 *E. coli* are enriched in AT-rich regions. This enrichment was particularly high for the pentanucleotides  
103 AAATT and AAAAT together with their complementary mates (Fig. 2A, left panel). This sequence  
104 preference of colibactin was evident when compared with either *pks-* *E. coli* infected or non-treated  
105 cells used as the control samples (Fig. S1A). It was detected independently in all four biological  
106 replicates, with almost identical relative enrichments (Fig. 2B, Tab. S1). Importantly, no meaningful  
107 sequence enrichments were detected when sequence content in close proximity to the DSBs observed  
108 in cells exposed to *pks-* *E. coli* was compared to that in non-treated cells (Fig. 2A, right panel). Hence,  
109 the preference for AT-rich sequences is directly linked to the action of colibactin, rather than *E. coli*  
110 infection *per se*. To identify the full motif, we analyzed the independent impact of 3' and 5' flanking  
111 sequences in both identified pentanucleotides for strength of enrichment. Motifs with up to one  
112 additional 3' adenine and/or 5' thymidine bases were enriched among breakpoints while no impact  
113 was observed for more distal nucleotides (Fig. 2C). We also used discriminative motif discovery  
114 (DREME)<sup>13</sup> between breakpoint contexts from *pks+* and *pks-* *E.coli* infected cells to further narrow

115 down the motif. The top-scoring motif was identified as AAWWTT (Fig. 2D), which contains the  
116 enriched pentanucleotide patterns and is compatible with the 3'/5' extensions represented in Fig. 2C.  
117 This symmetric motif indicates a requirement for distant adenines on opposing strands of the double  
118 helix while the preference for central A/T nucleotides might derive from dependency on additional  
119 conformational conditions.

120

### 121 **Preferred sites of colibactin action exhibit distinct DNA shape characteristics**

122 Small molecule DNA ligands bind preferentially through intercalation and/or contacts with the double  
123 helix major or minor groove, where binding specificity is usually defined by nucleotide sequence-  
124 dependent DNA shape characteristics (reviewed by Tse et al.<sup>14</sup>). To investigate whether colibactin has  
125 specific DNA shape preferences, we carried out predictions of the shape features in the proximity of  
126 each detected DSB. Remarkably, in close proximity ( $\pm 8$  bp) of the detected breakpoints, minor groove  
127 width (MGW) exhibited reproducible deviations from the line of averaged values at positions located  
128 further away from the DSBs. This was true not only for samples exposed to *pks+* *E. coli*, but also for all  
129 other samples (Fig. 3A). In addition, all other computationally predicted DNA shape features (helical  
130 twist, propeller twist, roll and electrostatic potential) also showed deviations within 8 bp of the DSBs  
131 in all samples (Fig. S2). To ensure that the specific landscape of DNA shape at the DSB position is not  
132 an artefact of our data analysis approach, the same analysis was performed on 10,000 sequences  
133 randomly chosen from the genome (Fig. 3A, inset). Prominent fluctuations of structural properties  
134 along the sequences were only observed in close proximity to the identified breaks. Regarding the  
135 specific properties of colibactin, we noticed that for all DNA shape patterns the average value at the  
136 exact breakpoints in *pks+* *E. coli*-infected cells was markedly different from that of all other samples  
137 (Fig. 3A enlargement and S2).

138 Averaged profiles describe the superposition of potentially many underlying shape motifs, many of  
139 which might be attributable to DSBs generated by processes other than colibactin and are shared

140 across conditions. To further explore the differences between the DNA shape parameters in the  
141 individual breakpoint positions of *pks+* and *pks-* *E. coli* infections in an unbiased manner, we applied k-  
142 means clustering as unsupervised machine learning algorithm. Assigning every set of predicted values  
143 of the DNA shape characteristics for each DSB to the closest centroid of 1 out of 9 clusters  
144 independently for both *pks+* and *pks-* *E. coli* induced DSBs, resulted in specific and unique shape  
145 patterns for each cluster (Fig. S3A,B). Interestingly, a quarter of all breakpoints from both infection  
146 models were assigned to the respective cluster 1 (Fig. 3B), whose profile amplitudes and pattern  
147 correspond to the global profile of MGW. To gain a better overview of the sequence content of each  
148 cluster, the probability for the presence of each nucleotide was computed for each position (top row  
149 for each cluster). As expected, MGW dips were associated with high AT-rich content in all clusters.  
150 Most of those dips correlate to short AT stretches most likely caused by periodic 10 bp spaced WW  
151 dinucleotide motifs in the genome sequence associated with nucleosome positioning<sup>15</sup>, which occur at  
152 different positions in the breakpoint context and are therefore distributed to separate clusters.

153 To determine whether any cluster was unique to a particular treatment, we compared clusters for both  
154 infection conditions. Indeed, cluster 9 of the *pks+* *E. coli* dataset was not paired with any *pks-* cluster  
155 for any of the parameters examined and showed the strongest deviations of shape parameters  
156 centered at the estimated DSB position. This was true regardless of whether clusters were compared  
157 separately for each predicted DNA shape parameter (Fig. S3C) or for all parameters together (Fig. 3C).  
158 This confirms that the sequences in proximity to the DSBs assigned to cluster 9 of *pks+* *E. coli* represent  
159 a group of breaks unique to this condition. Differences between MGW means for cluster 1 and 9 show  
160 how strongly AT-rich sequences influence local DNA shape (Fig. 3B).

161

## 162 **Colibactin's binding motif corresponds to extreme DNA shape parameter values**

163 In order to unveil the features of the DNA molecules preferred by colibactin, we analyzed the structural  
164 properties of the DNA stretches close to the identified DSBs. We correlated the predicted DNA shape

165 parameters for the central 1-2 bps of all possible pentanucleotides (1024) with the log<sub>2</sub>-ratios of  
166 pentanucleotide sequence enrichment in DSB positions caused by colibactin. Remarkably, colibactin's  
167 preferred pentanucleotide sequences, d(AAATT)-d(AATTT) and d(AAAAT)-d(ATTTT), were associated  
168 with the narrowest minor groove widths, with values below 3 and 3.7 Å respectively, as well as with  
169 some of the most negative values for propeller twist of the central base pair and extremely negative  
170 electrostatic potential (Fig. 4A). Closer inspection of the inter-base pair parameter roll revealed that  
171 AAATT, the most frequent pentamer that surrounds the break point, also shows very peculiar  
172 conformational characteristics (Figure 4A). The DNA stretch composed of A-tract followed by T-tract  
173 tract shows that the progressive narrowing of the DNA minor groove going from the 5' to the 3' end is  
174 correlated with low roll values. Values for the DNA stiffness descriptor (40) ( $k_{tot}$ , see Methods  
175 section), revealed that these tracts possess high intrinsic rigidity (Fig. 4A, Table S1), making them  
176 difficult to distort.

177 To obtain a more complete picture of the combined effect of the DNA shape characteristics, we  
178 extended this analysis to the central 5 bp of all possible 9 bp sequences and explored the multivariate  
179 space defined by all DNA shape parameters and at all positions by principal component analysis. Again,  
180 enriched motifs in pks+ *E. coli* infected cells compared to pks- *E. coli* stood out as an extreme group  
181 among all analyzed sequences (Fig. 4B). The data suggest that colibactin's binding preference for DNA  
182 stretches with the central pentanucleotides AAATT/AAAAT is driven not only by nucleotide content  
183 but also by particularly extreme values of sequence-associated DNA shape attributes like MGW and  
184 electrostatic potential. To probe this, we also calculated the molecular interaction potential (MIP)  
185 using Na<sup>+</sup> as probe for the most and the least preferred DNA central pentamers for colibactin binding  
186 (AATTT and CTTTG respectively). The isosurfaces for the two DNA sequences (Figure 4C, blue)  
187 confirmed strongly different electrostatic potential correlated with different minor groove  
188 conformations, which is likely to be related to the difference in colibactin binding affinity. All these  
189 observations suggest that the unusually narrow minor groove together with an inherent rigidity and a



190 marked electrostatic potential facilitate recognition and binding of colibactin, probably maximizing its  
191 interactions with the DNA.

192 In order to explore the binding between the DNA and colibactin we built a molecular model of  
193 colibactin (see Methods for details) using quantum mechanics (QM) calculations as first structural  
194 guess. The optimized structures were then hydrated and subjected to molecular dynamics (MD)  
195 simulations (details on parametrization are discussed in Methods) using state-of-the-art simulation  
196 conditions (see Methods). Colibactin appears as a rather flexible molecule, with an average end-to-  
197 end distance around 13 Å (Fig. S4). This suggests it can bind 4-5 base pairs if located along the minor  
198 groove, which is supported by its structure, its preference for AT-rich sequences, and its ability to  
199 attack N3. HADDOCK software<sup>16</sup> was used as docking engine, to obtain a putative binding mode. The  
200 default scoring function was supplemented by restraints forcing the orientation of the reactive  
201 cyclopropane moiety towards the N3 of the adenine. The best docking poses were manually curated  
202 and subjected to MD simulations (see Methods). The final putative model shows a very stable binding  
203 of colibactin to the minor groove (Figure 4D), with excellent van der Waals contacts with all the walls  
204 of the groove and the cyclopropane rings pointing towards the adenines on opposite strands (Fig. 4E).  
205 From the equilibrium trajectory we determined that the number of base pairs involved in the binding  
206 could fluctuate between 4 and 5, depending on the orientation of the cyclopropane, and the carbon  
207 alkylating the N3 of the adenines (Figure 4E, enlargement). In all cases colibactin fits perfectly into the  
208 narrow minor groove of the targeted sequences and adopts a spatial arrangement that would facility  
209 alkylation at N3.

210

### 211 **Somatic mutations at colibactin target sequences indicate role in cancerogenesis**

212 Having identified a specific nucleotide sequence associated with colibactin-induced DSBs, we  
213 wondered if we could identify a specific mutational signature associated with this sequence in cancers  
214 that have been experimentally connected to *pks+* *E. coli* infection<sup>2,17</sup>. Using whole-exome sequencing

215 (WXS) data from colorectal cancer samples <sup>18</sup> (n=619) and across several cancer entities in the TCGA  
216 project (<https://www.cancer.gov/tcga>, see Methods, n=553 colorectal cancers among 10,224 tumor  
217 cases in 24 cancer types), we tested whether somatic mutations are specifically enriched at the  
218 identified pentanucleotide sequences. We determined the hexanucleotide-specific mutation rate for  
219 all possible hexanucleotides adjusted for their frequency in exonic regions. Given colibactin's  
220 demonstrated preference for alkylation of adenines, we assessed the mutation rate for single  
221 nucleotide variants (SNV) at reference bases A or T. We hypothesized that preferential binding of  
222 colibactin to AAWWTT motifs (i.e. AAATTT or AATTTT/AAAATT) should increase the mutation rate at  
223 these motifs compared to all other hexanucleotides with the same length and nucleotide content (i.e.  
224 all remaining WWWWWW motifs). Since we observed that mutation rates at AAWWTT motifs were  
225 particularly high in hypermutator samples harbouring polymerase epsilon (POLE) mutations, we  
226 assessed mutation rates in cohorts defined by total SNV numbers per samples and POLE-mutated  
227 samples separately. We found that mutation rates in AAWWTT motifs were enriched compared to all  
228 other WWWWWW motifs in colorectal cancers in both data sets analyzed (Fig. 5A). In the TCGA pan-  
229 cancer data set we also found enrichment at AAWWTT motifs in stomach cancer, uterine corpus  
230 endometrioid cancer and breast cancer. No enrichment was found, e.g. in head and neck squamous  
231 cancer, lung adenocarcinoma and lung squamous carcinoma, while enrichment only for POLE mutated  
232 cases was found in bladder cancer and cervical squamous cancer (Fig. 5B).

233 We validated the findings from WXS data in a cohort of colorectal cancer assessed by whole genome  
234 sequencing (WGS) <sup>19</sup>. We analyzed enrichment of mutations at colibactin associated motifs for 208  
235 tumors including 193 microsatellite stable (MSS), 3 POLE mutated and 12 microsatellite instable (MSI)  
236 cases in a similar way as for WXS data but considering each sample separately instead of pooling in  
237 subcohorts. This allowed to identify enrichment and mutational loads for individual samples. We found  
238 significant (Mann-Whitney-U test, p<0.05, FDR <20%) enrichment of mutations at colibactin associated  
239 pentanucleotide motifs compared to other motifs with same length and A/T content in 3/3 POLE  
240 mutated samples and 49/193 (25.3%) MSS cases but not in MSI cases. We found similar enrichment as

241 for penta- (AAATT/AAAAT) for hexanucleotide (AAWWTT) motifs associated with colibactin in MSS  
242 samples (data not shown). The median number of mutations in MSS samples at colibactin associated  
243 motifs was 963 (range: 63-11876) corresponding to a median proportion of 6.7% (range: 3.9-44.7%).  
244 We next asked if an association exists between the preferred colibactin motif and any of the previously  
245 described mutational signatures<sup>20,21</sup>. Again, we used somatic mutation data from the TCGA data set as  
246 above and classified all single nucleotide variants according to the sequence context in direct proximity  
247 (+/- 5bp). Variants were assigned to one of three groups: Those with sequence context containing  
248 AAATT/AATTT or AAAAT/ATTTT, those with contexts containing a control TTT motif and all remaining  
249 mutations. Globally we observed distinct mutation frequencies for several trinucleotide changes (Fig.  
250 5C) in those classes. We identified a contribution of known signatures in those 3 classes for all samples  
251 and selected those with significantly higher contributions at AATTT or AAAT motifs compared to TTT  
252 and all other motifs (Fig. 5D). Two of the signatures with increased contributions at colibactin-  
253 associated motifs where of particular interest: SBS28  
254 (<https://cancer.sanger.ac.uk/cosmic/signatures/SBS/SBS28.tt>) and SBS41  
255 (<https://cancer.sanger.ac.uk/cosmic/signatures/SBS/SBS41.tt>) both with unknown etiology and  
256 featuring predominantly mutations at T:A and a prominent T[T>G]T trinucleotide change, were found  
257 enriched in colorectal cancers, among others. While SBS28 has been previously shown to be associated  
258 with POLE mutation-related hypermutated tumors, SBS41 was enriched in stomach adenocarcinoma,  
259 colorectal adenocarcinoma and endometrial carcinoma of the uterine corpus, mirroring the results for  
260 motif enrichment above.

261

## 262 Discussion

263 We pursued an unbiased bimodal approach that revealed a signature of the bacterial genotoxin  
264 colibactin in the human cancer genome indicating a causal link between a bacterial infection and the  
265 emergence of cancer. This was achieved by first defining the DSB-landscape generated by the action

266 of colibactin through applying the BLISS sequencing technology and subsequent comprehensive  
267 analysis of the genome-wide location of DSBs. The resulting DSB pattern, which exhibits exceptional  
268 structural features, corresponded to, and could be further refined by, three-dimensional modelling of  
269 the colibactin–DNA complex, involving distinct topological interactions with the minor-groove. In a  
270 second step, we used the identified motif to assign associated mutations in various cancer genome  
271 databases. Most interestingly, we revealed an enrichment of mutations at colibactin-associated motifs  
272 in colorectal cancers but also detectable in a few other cancer types, notably uterine endometroid and  
273 stomach cancer. We identified putative trinucleotide signatures (SBS41, SBS28) in the context of these  
274 mutant sites in the same cancer entities.

275 The identified AAATT and AAAAT motifs are associated with extreme physical values of the DNA  
276 duplex, most prominently characterized by a very narrow minor groove width, which generates highly  
277 negative electrostatic potential and renders the DNA segment stiff. This extreme physical property  
278 implicates a low propensity of the colibactin target site to bind to proteins<sup>22</sup>. In fact, poly(dA-dT)-tracts  
279 are rarely found inside nucleosomes, but are prevalent in nucleosome-free regions (NFRs)<sup>22</sup>. Thus,  
280 colibactin’s particular targeting preferences for non-protected DNA regions might increase the efficacy  
281 of the toxin. Even though definitive evidence of the binding conformation requires further  
282 experimental support from 3D structural analysis, the 3D model provided here allows for  
283 demonstrating and validating the extraordinary electrostatic properties of the identified motifs and  
284 the fit of colibactin to the minor groove. It puts a limit of 4-5 nucleotides on the distance of adenines  
285 attacked by the cyclopropane groups of the same molecule. Although most of the DNA shape  
286 characteristics are directly driven by the underlying sequence, the fact that other sequences with  
287 similar A/T content were not strongly enriched around DSBs indicates a dominance of DNA shape over  
288 sequence characteristics for the binding of colibactin.

289 Similar DNA shape and sequence affinities have been reported for other bacterial DNA toxins, such as  
290 duocarmycin, yatakemycin, distamycin, netropsin and CC-1065 – small molecules produced by  
291 *Streptomyces* spp., which are all minor groove binders with AT-rich sequence selectivity. Distamycin<sup>23</sup>

292 and netropsin <sup>24</sup> act as RNA and DNA polymerase inhibitors <sup>25</sup>, while duocarmycin, yatakemycin and  
293 CC-1065 are DNA alkylators. Duocarmycin <sup>26</sup> selectively alkylates adenine residues flanked by three 5'-  
294 A or T-bases (5'-WWWA-3') <sup>27</sup>, yatakemycin <sup>28</sup> preferentially alkylates the central adenine of a five-base  
295 AT site (5'-WWA-3') <sup>29</sup> and CC-1065 <sup>30,31</sup> shows selectivity for more extended five-base AT-rich  
296 alkylation sites (5'-WWWA-3') <sup>27</sup>. The fact that these toxins possess similar mechanisms of action,  
297 even though they derive from different bacterial strains, suggests that they arose via convergent  
298 evolution. Genotoxins are widespread amongst bacterial species, where they are thought to serve  
299 primarily for inter-microbial competition <sup>32</sup>. Unsurprisingly, therefore, all of the mentioned alkylating  
300 toxins inhibit the growth of many Gram-positive and Gram-negative bacteria as well as some  
301 pathogenic fungi, such as *Aspergillus fumigatus* and *Candida albicans* <sup>28,30</sup>. Similarly, *pks+* *E.coli* inhibit  
302 the growth of *Staphylococcus aureus*, also in its multi-resistant form <sup>33</sup>.

303 How colibactin-induced DNA damage is repaired is still unknown. Different host DNA repair  
304 mechanisms can be involved depending possibly also on the cell cycle phase. Effects of repair involve  
305 nucleotide excision <sup>34</sup> of alkylated adenines which could lead to DSBs, resection of break ends or  
306 complete repair, or error-prone repair by translesion DNA polymerases in late phases of the cell cycle,  
307 among others. We were able to show enrichment of SNV at colibactin-associated motifs in exome and  
308 whole-genome sequencing datasets. For colorectal cancers, whole-genome sequences revealed  
309 elevated mutation rates in colibactin associated motifs in at least 25% of all MSS cases and a colibactin  
310 attributable mutation load of around 6% in most patients. Further analyses of whole-genome  
311 sequenced samples including the analysis of breakpoints of structural variants will be required to  
312 assess the full spectrum of damage-related mutations in host cells. Mutational signatures for other  
313 alkylating substances, such as cisplatin, have been identified in human DNA sequences after exposure  
314 to the mutagen <sup>21,35</sup>. However, it is to be expected that the signatures depend strongly on the specific  
315 type of damage induced by each substance. Here we identified two signatures that are consistent with  
316 colibactin action, one with (SBS28) and one without (SBS41) relation to known DNA repair defects. An  
317 impact of reduced DNA repair and mutagen-induced damage on the emergence of different

318 mutational signatures has recently been shown in a model of *C. elegans*<sup>36</sup>. The enrichment of  
319 mutations specifically in POLE cases hints at either a similar outcome of distinct mutational processes  
320 or even a role of POLE in the repair of colibactin-associated damage.

321 Colibactin has been found not only in *E. coli* but also in *Klebsiella* isolates<sup>37</sup>. Considering the widespread  
322 and diversity of bacteria carrying this toxin, it is maybe not surprising that the mutational signature  
323 identified here is not only restricted to the colon. Rather, other tissues might also be colonized by  
324 either *pks+* *E. coli*, another species bearing the *pks* gene cluster, or a different species with a closely  
325 related genotoxin. Thus, our study will stimulate future research on other pathogen-host cell  
326 encounters that could lead to an even greater match of the identified signature with different cancer  
327 types. Better understanding of the role of the microbiome in malignant degeneration should provide  
328 new and exciting opportunities for cancer prevention.

329

330

## 331 **Materials and Methods**

### 332 **Cell line, bacterial strains, E.coli infection and etoposide-treatment**

333 Caco-2 cells (from ATCC® HTB-37™) were cultured at 37 °C under a water-saturated 5% CO<sub>2</sub>  
334 atmosphere, in DMEM medium (Life Technologies, cat. number: 10938-025), supplemented with 20%  
335 FCS (Biochrom, cat. number: S0115). Contamination of Mycoplasma spp. in immortal cell line was  
336 excluded using Venor®GeM OneStep PCR kit (Minerva Biolabs®, cat. number: 11-8250). To infect Caco-  
337 2 cells, overnight liquid culture of *E.coli* strain M1/5 (Streptomycin-resistant and colibactin-positive)  
338 and *E.coli* strain M1/5::ΔclbR (streptomycin-resistant and colibactin-negative) was set up. Bacteria  
339 were inoculated in 5 ml of Luria broth (LB) medium and incubated overnight at 37 °C in a shaking  
340 incubator. The overnight inoculum was diluted 1:33 in infection medium (DMEM + 10% FCS + HEPES  
341 (Life Technologies, cat. number: 15630-056)) to obtain OD<sub>600</sub>=1 after 3 h of incubation to give 1.5 x 10<sup>9</sup>

342 bacteria/ml. Prepared bacteria inoculum was further diluted to reach MOI 20, added to Caco-2 cells  
343 seeded previously and incubated for 3 hours at 37 °C. Medium was then aspirated and cells fixed  
344 according to the protocol for immunofluorescence or BLISS. For every biological replicate positive  
345 (etoposide-treatment) and negative (no treatment) controls were included. Etoposide powder (Sigma  
346 Aldrich, cat. number: E1383) was diluted in DMSO in order to reach 50 mM working solution. Aliquots  
347 of the drug were stored at -20 °C. Final drug dilutions to the concentration of 50 µM were performed  
348 in pre-warmed infection medium prior to each drug exposure. Treatment was conducted for 3 hours  
349 at 37 °C and afterwards medium was aspirated and etoposide-treated cells were fixed in the same way  
350 as E. coli-infected cells.

### 351 **Immunofluorescence staining**

352 Caco-2 cells grown and infected on MatTek glass-bottom dishes were washed three times with PBS  
353 (Life Technologies, cat. number: 14190-094) and fixed with 3.7% paraformaldehyde (Sigma Aldrich,  
354 cat. number: P6148) for 1 h. The cells were kept overnight in blocking buffer (3% BSA, Biomol, cat.  
355 number: 01400.100), 1% saponin (Sigma Aldrich, cat. number: 84510), 2% Triton X-100 (Carl Roth, cat.  
356 number: 3051.2) and 0.02% sodium azide (Sigma Aldrich, cat. number: S2002). Blocking was followed  
357 by overnight incubation with  $\gamma$ H2AX antibody (Phospho-Histone H2A.X (Ser139) Antibody, Cell  
358 Signaling, cat. number: 2577, 1:500 dilution) at 4 °C. The next day, the MatTek dishes were washed  
359 three times with blocking buffer followed by overnight incubation with secondary antibody (Dianova,  
360 cat. number: 711-035-152, 1:250 dilution) diluted in blocking buffer. Phalloidin 546 (Invitrogen, cat.  
361 number: A22283, 1:200 dilution) and Hoechst (Sigma, cat. number: H6024, 1:10000 dilution) were  
362 added for staining actin filaments and DNA, respectively. The next day, cells were washed three times  
363 with blocking buffer and coverslipped using Vectashield® Antifade Mounting Medium (Vector  
364 Laboratories, cat. number: H-1000). Images were acquired using a Leica TCS SP-8 confocal microscope  
365 and processed using ImageJ.

366

### 367 **sBLISS, an adaptation of the BLISS method**

368 DSBs were identified using the suspension-cell BLISS (sBLISS) method<sup>38</sup>, which is an adaptation of the  
369 previously published BLISS protocol<sup>8,39</sup>. In contrast to BLISS, where DSBs are labeled in fixed cells  
370 immobilized on microscope slide, in sBLISS DSBs are labeled in fixed cell suspensions. In brief, cells  
371 were treated/infected in culture dishes and afterwards trypsinized, counted, centrifuged and  
372 resuspended in pre-warmed medium to obtain 10<sup>6</sup> cells per 1 ml. Then, cells were fixed by adding 16%  
373 PFA (Electron Microscopy Sciences, cat. number: 15710) to reach a final concentration of 4%. After 10  
374 minutes, 2 M glycine (Molecular Dimensions, cat. number: MD2-100-105) was added to a final  
375 concentration of 125 mM in order to block unreacted aldehydes. This was followed by two 5 minutes  
376 incubations, first at room temperature and then on ice, followed by two washes in ice-cold PBS. Cross-  
377 linked cells were stored in PBS at 4 °C until further processing.

378 Next, BLISS template was prepared. This includes: (1) Cell lysis in 10mM Tris-HCl, 10 mM NaCl, 1 mM  
379 EDTA, and 0.2% Triton X-100 (pH 8) buffer, followed with lysis in buffer containing 10 mM Tris-HCl, 150  
380 mM NaCl, 1 mM EDTA, and 0.3% SDS (pH 8); (2) DSBs blunting with NEB's Quick Blunting Kit (NEB, cat.  
381 number: E1201); (3) *In situ* BLISS adapter ligation using T4 DNA Ligase (ThermoFisher Scientific, cat.  
382 number: EL0011). Each BLISS adapter contained a T7 promoter sequence for IVT, the RA5 Illumina RNA  
383 adapter sequence, a random 8nt long sequence referred to as Unique Molecular Identifier (UMI) and  
384 a 8nt long sample barcode; (4) Phenol:chloroform-based extraction of gDNA; (5) Fragmentation of  
385 isolated genomic DNA (400-600bp) using BioRuptor Plus (Diagenode). Obtained BLISS templates were  
386 stored at -20 °C.

387 The final step of the BLISS protocol was *in vitro* transcription (IVT) followed by NGS library preparation.  
388 At first, 100ng of purified, sonicated and differentially-barcoded BLISS template of 1) etoposide-  
389 treated and non-treated cells, or 2) cells infected with pks+ E.coli or infected with pks- E.coli were  
390 pooled into one reaction, respectively. IVT was performed using MEGAscript T7 Transcription Kit  
391 (ThermoFisher, cat. number: AMB13345) for 14 hours at 37 °C in the presence of RiboSafe RNase  
392 Inhibitor (Bioline, cat. number BIO-65028). Next, gDNA was removed using DNase I (ThermoFisher, cat.  
393 number: AM2222) and the remaining RNA was purified with Agencourt RNAClean XP beads (Beckman



394 Coulter). The Illumina RA3 adapter sequence was ligated to the purified RNA using T4 RNA Ligase 2  
395 (NEB, cat. number: M0242) for 2 hours at 25 °C and reverse transcription was performed with Reverse  
396 Transcription Primer (Illumina sequence) using SuperScript IV Reverse Transcriptase (ThermoFisher,  
397 cat. number: 18090050) for 50 minutes at 50 °C. This was followed by enzyme heat inactivation for 10  
398 minutes at 80 °C. Finally, libraries were amplified with NEBNext High-Fidelity 2x PCR Master Mix (NEB,  
399 cat. number: M0541), the RP1 common primer and a uniquely selected index primer. 12 PCR cycles  
400 were conducted, and after that libraries were purified according to the two-sided AMPure XP bead  
401 purification protocol (Beckman Coulter). Profiles of the libraries were quantified on a BioAnalyzer High  
402 Sensitivity DNA chip. Libraries were sequenced as single-end (1x75) reads on the NextSeq platform.

### 403 **Pre-processing of sequencing data**

404 Raw sequencing data were pre-processed as previously described <sup>7</sup>. In brief, only reads which  
405 contained the expected prefix of UMI and sample barcode were kept using SAMtools <sup>40</sup>. One mismatch  
406 in the barcode sequence was allowed. Further, prefixes were trimmed and the remaining sequences  
407 were aligned to the GRCh37/hg19 reference genome using BWA-MEM <sup>41</sup>. Reads with mapping quality  
408 scores  $\leq 30$  and those which were determined as PCR duplicates were removed. Finally, a BED file  
409 containing a list of unique DSBs locations was generated. DSBs which fell into ENCODE blacklist regions  
410 <sup>42</sup>, high coverage regions <sup>34</sup> and low mappability regions <sup>34</sup> were removed. Kept positions of DSBs were  
411 further used in downstream analysis.

### 412 **Locus Overlap Analysis**

413 To identify significant overlaps of DNA DSB with genomic region sets we used LOLA <sup>11</sup>. We first defined  
414 whole genome as a Universe Set, which was next divided into tiles of equal lengths (1,000 nt). For each  
415 created tile we next searched for overlaps with captured by BLISS DSBs using the findOverlap()  
416 function. All tiles containing  $\geq 10$  breaks were used as a Query Set. The runLOLA() function was  
417 executed with LOLA Core databases (reduced by Tissue clustered DNase hypersensitive sites) as well

418 as LOLA Extended databases and custom database containing non-B-DNA regions ([https://nonb-](https://nonb-abcc.ncifcrf.gov/apps/site/references)  
419 [abcc.ncifcrf.gov/apps/site/references](https://nonb-abcc.ncifcrf.gov/apps/site/references)). Fisher's exact test was used with a FDR  $\leq$  5%.

#### 420 **DNA Shape predictions**

421 DNA structures can be described in terms of base-pair and base-step parameters that consist of three  
422 translational and rotational movements between the bases or the base pairs, respectively. At the base-  
423 pair step level, DNA deformability along these six directions has been described by the associated  
424 stiffness matrix<sup>43</sup>. From the ensemble of MD simulations considering the tetramer environment using  
425 the newly refined parmbsc1 force field, we retrieved the 6x6 matrix describing the deformability of  
426 the helical parameters for each possible DNA tetramer. Pure stiffness constants corresponding to the  
427 six base-pair step parameters (shift, slide, rise, tilt, roll and twist) were extracted from the diagonal of  
428 the matrix and the total stiffness ( $K_{tot}$ ) was obtained as a product of these six constants and used as  
429 an estimate of the flexibility of each base pair step in a tetramer. For predictions of minor groove width  
430 (MGW), propeller twist (ProT), electrostatic potential (EP), helical twist (HeIT) and roll (Roll) the  
431 getShape function from 'DNASHapeR' package was used<sup>44</sup>. Input FASTA files, containing sequences in  
432 close proximity to identified DSB ( $\pm 5$ nt or  $\pm 100$ nt), were extracted with custom python script (available  
433 upon request). The interaction potential (electrostatic and van der Waals) of Na<sup>+</sup> probes with DNA  
434 duplexes was determined using a linear approximation to the Poisson-Boltzmann equation and  
435 dielectric constant for the DNA as implemented in the CMIP program<sup>45</sup>.

#### 436 **K-means clustering of DNA shape profiles**

437 We used an elbow method to find appropriate number of clusters in the dataset, which consisted of  
438 predicted values of all parameters (MGW, HeIT, ProT, Roll, EP)  $\pm 8$  nt from each breakpoint. Based on  
439 cluster number diagnostic it was chosen to use k=9. Initial cluster centers were defined using 100  
440 iterations. Next, we assigned every set of observations for each breakpoint into the closest centroid of  
441 1 out of 9 clusters, independently for both – pks+ and pks- E.coli-induced DSB. Finally, sequence

442 content of each cluster was exported and used as an input for computing proportion of each nucleotide  
443 per position (see SeqLogo method).

#### 444 **SeqLogo**

445 To compute and visualize the proportion of each nucleotide per position from collection of sequences  
446 `consensusMatrix()` and `seqLogo()` functions from 'seqLogo' package were used <sup>46,47</sup>

#### 447 **Model and Molecular dynamics set up**

448 The 3D structure and protonation state of the colibactin were built starting from the smile  
449 (<https://pubchem.ncbi.nlm.nih.gov/compound/138805674#section=InChI>) using MarvinSketch  
450 (MarvinSketch, version 6.2.2, calculation module developed by ChemAxon,  
451 <http://www.chemaxon.com/products/marvin/marvinsketch/>). The geometry of the model and the  
452 partial atomic charges were assigned to the structure with General Amber Force Field (GAFF) <sup>48</sup>.  
453 Parameters and topology files were prepared with Acypype <sup>49</sup>. The colibactin was then simulated in  
454 explicit solvent at 298K (see below for details) for 250ns and along the simulation the distance between  
455 the cyclopropanes was monitored (see Fig.S4), to study their orientation and the overall length of the  
456 free colibactin. Using HADDOCK 2.4 <sup>16</sup>, we then built the complex DNA-colibactin. For the docking, we  
457 selected a representative structure of the free colibactin along the MD simulation, with an average  
458 distance among the cyclopropanes (red line, Fig. S4) and an equilibrated structure of the DNA  
459 (sequence CGAAATTTTCG). After the initial docking, that positioned the molecule correctly along the  
460 minor groove of the DNA, we then manually rotated slightly the molecule to improve the orientation  
461 of the cyclopropanes towards the N3 of the closest adenine using PYMOL (The PyMOL Molecular  
462 Graphics System, Schrödinger, LLC (2018)). To check the stability of this complex and to equilibrate its  
463 structure the model was simulated (see details MD simulation below) and minimized in solution with  
464 positional restraints on the solute using our well-established multi-step protocol <sup>50,51</sup>. The minimized  
465 structure was thermalized to 298K at NVT, and then simulated first applying harmonic restraints of 5  
466 kcal/mol·Å<sup>2</sup> on the DNA on the DNA structure and distance constraints between the cyclopropane and

467 the N3 of the adenine (respectively 4 and 5 bases apart), each represented by a harmonic restraint of  
468 2.5 kcal/mol·Å<sup>2</sup>. To further check the stability of the complex we then slowly removed the constraints  
469 and run MD simulation of the complex during 60 ns by means of Molecular Dynamics simulations at  
470 NPT (P = 1 atm; T= 298K). The first 10 ns of the simulations were considered as an equilibration step  
471 and were discarded for further analysis.

472 In each MD simulation, DNA, free colibactin and their complex, respectively, we placed the solute in  
473 the centre of a truncated octahedral box of TIP3P water molecules<sup>52</sup>, neutralized by K<sup>+</sup> ions. In each  
474 simulation the Berendsen algorithm<sup>53</sup> was used to control the temperature and the pressure, with a  
475 coupling constant of 5 ps; and the SHAKE algorithm was utilized to equilibrium the length of hydrogen  
476 atoms involved in the covalent bonds<sup>54</sup>. Long-range electrostatic interactions were accounted for by  
477 using the Particle Mesh Ewald method (14) with standard defaults, and a real-space cut-off of 10 Å.  
478 For the DNA we used the newly revised force field parmBSC1<sup>55</sup>. All simulations were carried out using  
479 AMBER 18<sup>56</sup>, and analyzed with CPPTRAJ<sup>57</sup> and visualized using VMD 1.9.4<sup>58</sup>.

480

#### 481 **Cancer somatic mutation data**

482 We obtained somatic variant data from the TCGA Unified Ensemble "MC3" Call Set<sup>59</sup> ("TCGA pan-  
483 cancer dataset") and from the supplementary data of Giannakis et al<sup>18</sup>. To test for enrichment of  
484 mutations at any motif we first identified positions of all hexanucleotide motifs in the exonic portion  
485 of the genome. Somatic variants occurring at A or T bases were grouped in one of 6 classes (quartile  
486 1-4, outlier or POLE mutated sample) depending on the total SNV number and POLE mutation status  
487 of the corresponding tumor sample We then computed the mutation rate for each hexanucleotide  
488 motif with respect to the number of genomic bases covered in exonic regions for the same motif. As a  
489 baseline, we established the mutation rates of all WWWWWW motifs and subtracted their mean from  
490 the mutation rate of all other hexanucleotide motifs. We then tested for significance of the mutation  
491 rate at colibactin associated AAWWTT motifs (i.e. AAATTT and AAAATT/AATTTT) compared to the

492 remaining WWWWW motifs using Mann-Whitney-U tests and computed the false discovery rate  
493 (FDR) using the method of Benjamini-Hochberg <sup>60</sup>. Reads from WGS of colorectal cancers <sup>19</sup> EGA  
494 database accession code [EGAS000001003010](https://ega.ncbi.nlm.nih.gov/ega/studies/EGAS000001003010), ) were aligned to GRCh38 with BWA-MEM <sup>41</sup> and called  
495 using Mutect2 <sup>61</sup>. All single nucleotide variant calls (PASSED by Mutect2) were used to determine the  
496 number of mutations overlapping WWWWW pentanucleotides and WWWWWW hexanucleotides and  
497 further analyzed in a similar way as for exome sequencing data on an individual sample basis.

#### 498 **Analysis of pattern enrichment in cancers**

499 For analysis of signatures we classified all variants according to the presence of patterns in the +/- 5bp  
500 around SNV variant calls: one group contained colibactin associated pentanucleotides (AAATT/AATTT  
501 or AAAAT/ATTTT), one contained AAA/TTT in order to control for AT-rich sequences and one contained  
502 all other motifs. The R package deconstructSigs <sup>62</sup> was used to estimate the contribution of COSMIC  
503 signatures v3 <sup>21</sup> independently for each group. Differences between groups were assessed for each  
504 single base change signature (SBS) between groups using Mann-Whitney test.

#### 505 **Data analysis and visualization**

506 All visualizations and statistical analyses were produced using R v3.4 <sup>63</sup>

507

508

509 **References and Notes**

- 510 1 Castellarin, M. *et al.* Fusobacterium nucleatum infection is prevalent in human colorectal  
511 carcinoma. *Genome Res* **22**, 299-306, doi:10.1101/gr.126516.111 (2012).
- 512 2 Arthur, J. C. *et al.* Intestinal inflammation targets cancer-inducing activity of the microbiota.  
513 *Science* **338**, 120-123, doi:10.1126/science.1224820 (2012).
- 514 3 Cougnoux, A. *et al.* Bacterial genotoxin colibactin promotes colon tumour growth by inducing  
515 a senescence-associated secretory phenotype. *Gut* **63**, 1932-1942, doi:10.1136/gutjnl-2013-  
516 305257 (2014).
- 517 4 Bleich, R. M. & Arthur, J. C. Revealing a microbial carcinogen. *Science* **363**, 689-690,  
518 doi:10.1126/science.aaw5475 (2019).
- 519 5 Nougayrede, J. P. *et al.* Escherichia coli induces DNA double-strand breaks in eukaryotic cells.  
520 *Science* **313**, 848-851, doi:10.1126/science.1127059 (2006).
- 521 6 Wilson, M. R. *et al.* The human gut bacterial genotoxin colibactin alkylates DNA. *Science* **363**,  
522 doi:10.1126/science.aar7785 (2019).
- 523 7 Xue, M. *et al.* Structure elucidation of colibactin and its DNA cross-links. *Science* **365**,  
524 doi:10.1126/science.aax2685 (2019).
- 525 8 Yan, W. X. *et al.* BLISS is a versatile and quantitative method for genome-wide profiling of  
526 DNA double-strand breaks. *Nat Commun* **8**, 15058, doi:10.1038/ncomms15058 (2017).
- 527 9 Brotherton, C. A., Wilson, M., Byrd, G. & Balskus, E. P. Isolation of a metabolite from the pks  
528 island provides insights into colibactin biosynthesis and activity. *Org Lett* **17**, 1545-1548,  
529 doi:10.1021/acs.orglett.5b00432 (2015).
- 530 10 Canela, A. *et al.* Genome Organization Drives Chromosome Fragility. *Cell* **170**, 507-521.e518,  
531 doi:10.1016/j.cell.2017.06.034 (2017).
- 532 11 Yang, F., Kemp, C. J. & Henikoff, S. Anthracyclines induce double-strand DNA breaks at active  
533 gene promoters. *Mutat Res* **773**, 9-15, doi:10.1016/j.mrfmmm.2015.01.007 (2015).
- 534 12 Sheffield, N. C. & Bock, C. LOLA: enrichment analysis for genomic region sets and regulatory  
535 elements in R and Bioconductor. *Bioinformatics* **32**, 587-589,  
536 doi:10.1093/bioinformatics/btv612 (2016).
- 537 13 Bailey, T. L. DREME: motif discovery in transcription factor ChIP-seq data. *Bioinformatics* **27**,  
538 1653-1659, doi:10.1093/bioinformatics/btr261 (2011).
- 539 14 Tse, W. C. & Boger, D. L. Sequence-selective DNA recognition: natural products and nature's  
540 lessons. *Chem Biol* **11**, 1607-1617, doi:10.1016/j.chembiol.2003.08.012 (2004).
- 541 15 Segal, E. *et al.* A genomic code for nucleosome positioning. *Nature* **442**, 772-778,  
542 doi:10.1038/nature04979 (2006).
- 543 16 van Zundert, G. C. P. *et al.* The HADDOCK2.2 Web Server: User-Friendly Integrative Modeling  
544 of Biomolecular Complexes. *J Mol Biol* **428**, 720-725, doi:10.1016/j.jmb.2015.09.014 (2016).
- 545 17 Buc, E. *et al.* High prevalence of mucosa-associated E. coli producing cyclomodulin and  
546 genotoxin in colon cancer. *PLoS One* **8**, e56964, doi:10.1371/journal.pone.0056964 (2013).
- 547 18 Giannakis, M. *et al.* Genomic Correlates of Immune-Cell Infiltrates in Colorectal Carcinoma.  
548 *Cell Rep* **15**, 857-865, doi:10.1016/j.celrep.2016.03.075 (2016).
- 549 19 Katainen, R. *et al.* CTCF/cohesin-binding sites are frequently mutated in cancer. *Nat Genet*  
550 **47**, 818-821, doi:10.1038/ng.3335 (2015).
- 551 20 Tate, J. G. *et al.* COSMIC: the Catalogue Of Somatic Mutations In Cancer. *Nucleic Acids Res* **47**,  
552 D941-d947, doi:10.1093/nar/gky1015 (2019).
- 553 21 Alexandrov, L. B. *et al.* The Repertoire of Mutational Signatures in Human Cancer. *bioRxiv*,  
554 322859, doi:10.1101/322859 (2018).
- 555 22 Chakraborty, A. *et al.* DNA structure directs positioning of the mitochondrial genome  
556 packaging protein Abf2p. *Nucleic Acids Res* **45**, 951-967, doi:10.1093/nar/gkw1147 (2017).
- 557 23 Arcamone, F., Penco, S., Orezzi, P., Nicoletta, V. & Pirelli, A. STRUCTURE AND SYNTHESIS OF  
558 DISTAMYCIN A. *Nature* **203**, 1064-1065, doi:10.1038/2031064a0 (1964).

- 559 24 Finlay, A., Hochstein, F., Sobin, B. & Murphy, F. Netropsin, a new antibiotic produced by a  
560 Streptomyces. *Journal of the American Chemical Society* **73**, 341-343 (1951).
- 561 25 Hahn, F. E. Distamycins and netropsin as inhibitors of RNA and DNA polymerases.  
562 *Pharmacology & Therapeutics. Part A: Chemotherapy, Toxicology and Metabolic Inhibitors* **1**,  
563 475-485 (1977).
- 564 26 Takahashi, I. *et al.* Duocarmycin A, a new antitumor antibiotic from Streptomyces. *J Antibiot*  
565 *(Tokyo)* **41**, 1915-1917, doi:10.7164/antibiotics.41.1915 (1988).
- 566 27 Boger, D. L. & Johnson, D. S. CC-1065 and the duocarmycins: unraveling the keys to a new  
567 class of naturally derived DNA alkylating agents. *Proc Natl Acad Sci U S A* **92**, 3642-3649,  
568 doi:10.1073/pnas.92.9.3642 (1995).
- 569 28 Igarashi, Y. *et al.* Yatakemycin, a novel antifungal antibiotic produced by Streptomyces sp. TP-  
570 A0356. *J Antibiot (Tokyo)* **56**, 107-113, doi:10.7164/antibiotics.56.107 (2003).
- 571 29 Parrish, J. P., Kastrinsky, D. B., Wolkenberg, S. E., Igarashi, Y. & Boger, D. L. DNA alkylation  
572 properties of yatakemycin. *J Am Chem Soc* **125**, 10971-10976, doi:10.1021/ja035984h (2003).
- 573 30 Hanka, L. J., Dietz, A., Gerpheide, S. A., Kuentzel, S. L. & Martin, D. G. CC-1065 (NSC-298223),  
574 a new antitumor antibiotic. Production, in vitro biological activity, microbiological assays and  
575 taxonomy of the producing microorganism. *J Antibiot (Tokyo)* **31**, 1211-1217,  
576 doi:10.7164/antibiotics.31.1211 (1978).
- 577 31 Hurley, L. H. & Rokem, J. S. Biosynthesis of the antitumor antibiotic CC-1065 by Streptomyces  
578 zelensis. *J Antibiot (Tokyo)* **36**, 383-390, doi:10.7164/antibiotics.36.383 (1983).
- 579 32 Hibbing, M. E., Fuqua, C., Parsek, M. R. & Peterson, S. B. Bacterial competition: surviving and  
580 thriving in the microbial jungle. *Nat Rev Microbiol* **8**, 15-25, doi:10.1038/nrmicro2259 (2010).
- 581 33 Fais, T. *et al.* Antibiotic Activity of Escherichia coli against Multiresistant Staphylococcus  
582 aureus. *Antimicrob Agents Chemother* **60**, 6986-6988, doi:10.1128/aac.00130-16 (2016).
- 583 34 Martin, L. P., Hamilton, T. C. & Schilder, R. J. Platinum resistance: the role of DNA repair  
584 pathways. *Clin Cancer Res* **14**, 1291-1295, doi:10.1158/1078-0432.Ccr-07-2238 (2008).
- 585 35 Boot, A. *et al.* In-depth characterization of the cisplatin mutational signature in human cell  
586 lines and in esophageal and liver tumors. *Genome Res* **28**, 654-665,  
587 doi:10.1101/gr.230219.117 (2018).
- 588 36 Volkova, N. V. *et al.* Mutational signatures are jointly shaped by DNA damage and repair.  
589 *bioRxiv*, 686295, doi:10.1101/686295 (2019).
- 590 37 Putze, J. *et al.* Genetic structure and distribution of the colibactin genomic island among  
591 members of the family Enterobacteriaceae. *Infect Immun* **77**, 4696-4703,  
592 doi:10.1128/iai.00522-09 (2009).
- 593 38 Gothe, H. J. *et al.* Spatial Chromosome Folding and Active Transcription Drive DNA Fragility  
594 and Formation of Oncogenic MLL Translocations. *Mol Cell* **75**, 267-283.e212,  
595 doi:10.1016/j.molcel.2019.05.015 (2019).
- 596 39 Zhang, F. *et al.* Breaks Labeling in situ and sequencing (BLISS). *Protocol Exchange DOI:*  
597 **10.1038/protex.2017.018** (2017).
- 598 40 Li, H. *et al.* The Sequence Alignment/Map format and SAMtools. *Bioinformatics* **25**, 2078-  
599 2079, doi:10.1093/bioinformatics/btp352 (2009).
- 600 41 Li, H. & Durbin, R. Fast and accurate short read alignment with Burrows-Wheeler transform.  
601 *Bioinformatics* **25**, 1754-1760, doi:10.1093/bioinformatics/btp324 (2009).
- 602 42 An integrated encyclopedia of DNA elements in the human genome. *Nature* **489**, 57-74,  
603 doi:10.1038/nature11247 (2012).
- 604 43 Drsata, T. *et al.* Mechanical properties of symmetric and asymmetric DNA A-tracts:  
605 implications for looping and nucleosome positioning. *Nucleic Acids Res* **42**, 7383-7394,  
606 doi:10.1093/nar/gku338 (2014).
- 607 44 Chiu, T. P. *et al.* DNASHAPER: an R/Bioconductor package for DNA shape prediction and  
608 feature encoding. *Bioinformatics* **32**, 1211-1213, doi:10.1093/bioinformatics/btv735 (2016).
- 609 45 Gelpi, J. L. *et al.* Classical molecular interaction potentials: improved setup procedure in  
610 molecular dynamics simulations of proteins. *Proteins* **45**, 428-437 (2001).

- 611 46 Schneider, T. D. & Stephens, R. M. Sequence logos: a new way to display consensus  
612 sequences. *Nucleic Acids Res* **18**, 6097-6100, doi:10.1093/nar/18.20.6097 (1990).
- 613 47 Bembom, O. seqLogo: Sequence logos for DNA sequence alignments. R package version  
614 1.44.0. (2017).
- 615 48 Wang, J., Wolf, R. M., Caldwell, J. W., Kollman, P. A. & Case, D. A. Development and testing of  
616 a general amber force field. *J Comput Chem* **25**, 1157-1174, doi:10.1002/jcc.20035 (2004).
- 617 49 Sousa da Silva, A. W. & Vranken, W. F. ACPYPE - AnteChamber PYthon Parser interfacE. *BMC*  
618 *Res Notes* **5**, 367, doi:10.1186/1756-0500-5-367 (2012).
- 619 50 Dans, P. D. *et al.* Long-timescale dynamics of the Drew-Dickerson dodecamer. *Nucleic Acids*  
620 *Res* **44**, 4052-4066, doi:10.1093/nar/gkw264 (2016).
- 621 51 Perez, A., Luque, F. J. & Orozco, M. Dynamics of B-DNA on the microsecond time scale. *J Am*  
622 *Chem Soc* **129**, 14739-14745, doi:10.1021/ja0753546 (2007).
- 623 52 Jorgensen, W. L., Chandrasekhar, J., Madura, J. D., Impey, R. W. & Klein, M. L. Comparison of  
624 simple potential functions for simulating liquid water. *The Journal of chemical physics* **79**,  
625 926-935 (1983).
- 626 53 Berendsen, H. J., Postma, J. v., van Gunsteren, W. F., DiNola, A. & Haak, J. R. Molecular  
627 dynamics with coupling to an external bath. *The Journal of chemical physics* **81**, 3684-3690  
628 (1984).
- 629 54 Ryckaert, J.-P., Ciccotti, G. & Berendsen, H. J. Numerical integration of the cartesian  
630 equations of motion of a system with constraints: molecular dynamics of n-alkanes. *Journal*  
631 *of computational physics* **23**, 327-341 (1977).
- 632 55 Ivani, I. *et al.* Parmbsc1: a refined force field for DNA simulations. *Nat Methods* **13**, 55-58,  
633 doi:10.1038/nmeth.3658 (2016).
- 634 56 Case, D. *et al.* AMBER 18. University of California, San Francisco (2018).
- 635 57 Roe, D. R. & Cheatham, T. E., 3rd. PTRAJ and CPPTRAJ: Software for Processing and Analysis  
636 of Molecular Dynamics Trajectory Data. *J Chem Theory Comput* **9**, 3084-3095,  
637 doi:10.1021/ct400341p (2013).
- 638 58 Humphrey, W., Dalke, A. & Schulten, K. VMD: visual molecular dynamics. *J Mol Graph* **14**, 33-  
639 38, 27-38 (1996).
- 640 59 Ellrott, K. *et al.* Scalable Open Science Approach for Mutation Calling of Tumor Exomes Using  
641 Multiple Genomic Pipelines. *Cell Syst* **6**, 271-281.e277, doi:10.1016/j.cels.2018.03.002 (2018).
- 642 60 Benjamini, Y. & Hochberg, Y. Controlling the false discovery rate: a practical and powerful  
643 approach to multiple testing. *Journal of the Royal statistical society: series B*  
644 *(Methodological)* **57**, 289-300 (1995).
- 645 61 Cibulskis, K. *et al.* Sensitive detection of somatic point mutations in impure and  
646 heterogeneous cancer samples. *Nat Biotechnol* **31**, 213-219, doi:10.1038/nbt.2514 (2013).
- 647 62 Rosenthal, R., McGranahan, N., Herrero, J., Taylor, B. S. & Swanton, C. DeconstructSigs:  
648 delineating mutational processes in single tumors distinguishes DNA repair deficiencies and  
649 patterns of carcinoma evolution. *Genome Biol* **17**, 31, doi:10.1186/s13059-016-0893-4  
650 (2016).
- 651 63 R Core Team. : A Language and Environment for Statistical Computing. *R Foundation for*  
652 *Statistical Computing, Vienna, Austria*, <https://www.R-project.org>.

653

654



655 **Acknowledgements**

656 The results shown here are in whole or part based upon data generated by the TCGA Research  
657 Network: <https://www.cancer.gov/tcga>. The authors would like to thank Dr. Silvano Garnerone from  
658 N.C. laboratory for processing raw BLISS data, Prof. Pablo D. Dans from Biophysical Chemistry Lab.,  
659 Department of Biological Science (CENUR Litoral Norte), UdelaR, UY, for constructive discussions about  
660 the theoretical model of colibactin, Prof. Ulrich Dobrindt from University of Münster for providing  
661 E.coli strains and Rike Zietlow for editing the manuscript.

662 **Funding**

663 P.J.D.K. was supported by IMPRS. B.A.M.B was supported by a Rubicon fellowship from the  
664 Netherlands Organisation for Scientific Research (NWO). M.O. is an ICREA (Institució Catalana de  
665 Recerca i Estudis Avancats) academia researcher. This work was supported by the Spanish Ministry of  
666 Science (grants BIO2015-64802-R-), Spanish Ministry of Science (BFU2014-61670-EXP and BFU2014-  
667 52864-R), the Catalan Government (grants 2014-SGR); the Instituto de Salud Carlos III-Instituto  
668 Nacional de Bioinformática (ISCIII PT 13/000/0030 co-funded by the Fondo Europeo de Desarrollo  
669 Regional [FEDER] and the Biomolecular and Bioinformatics Resources Platform) and the European  
670 Union's Horizon 2020 research and innovation program (grants Elixir-Excelerate: 676559;  
671 BioExcel2:823830), the MINECO Severo Ochoa Award of Excellence from the Government of Spain  
672 (awarded to IRB Barcelona), the Karolinska Institutet, the Ragnar Söderberg Foundation, the Swedish  
673 Foundation for Strategic Research (to N.C.: BD15-0095), and the Strategic Research Programme in  
674 Cancer (StratCan) at Karolinska Institutet.

675 **Author contributions**

676 P.J.D.K, H.B. and T.F.M. designed experiments, P.J.D.K. and B.A.M.B. performed sBLISS experiments,  
677 A.I. performed E.coli infection and immunostaining. Bioinformatics analysis were performed by P.J.D.K.  
678 and H.B. Theoretical model of colibactin was built by F.B. and M.O. R.K. and L.A.A. provided and  
679 analyzed WGS colorectal cancer data. The manuscript was written by P.J.D.K., H.B., F.B. and T.F.M.

680 **Competing interests**

681 The authors declare no competing interests

682 **Data and materials availability**

683 Input FASTA files and analysis scripts are available upon request. All other data is available in the main  
684 text or supplementary materials.

685

686 **Figure Legends**

687

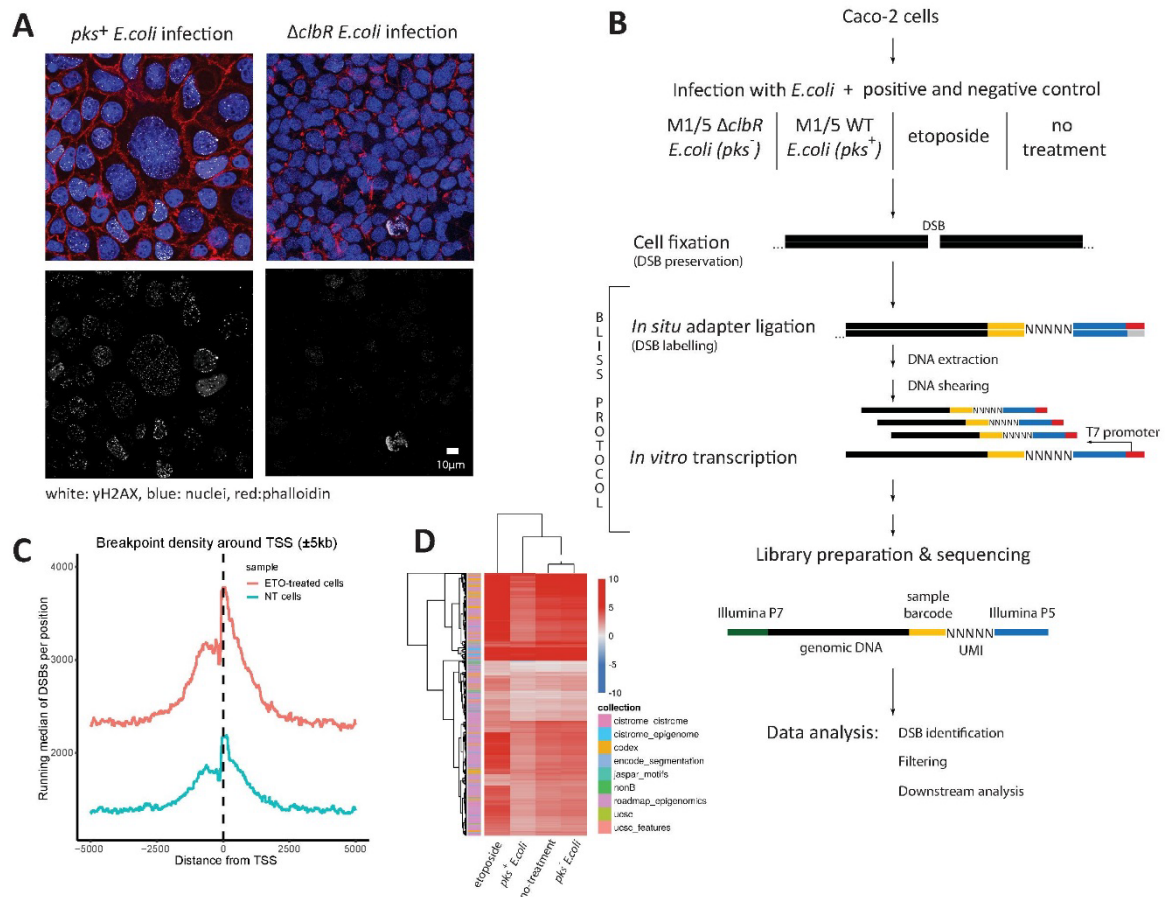

688

689 **Fig. 1. Identification of host DSB upon pks+ E.coli infection**

690 (A) Colibactin-producing E.coli infection causes  $\gamma$ H2AX expression in Caco-2 cells.

691 (B) Experimental design for identification of positions of colibactin-induced DSBs with simplified BLISS  
692 protocol.

693 (C) BLISS signal of etoposide-induced DSB shows increased counts compared to control condition.

694 (D) Heatmap indicating the log2 odds ratio of break enrichment in genomic region sets (FDR < 5%)  
695 compared to the rest of the genome for pks+ and pks- E.coli infected cells, etoposide treated and for  
696 non-treated Caco-2 cells.

697

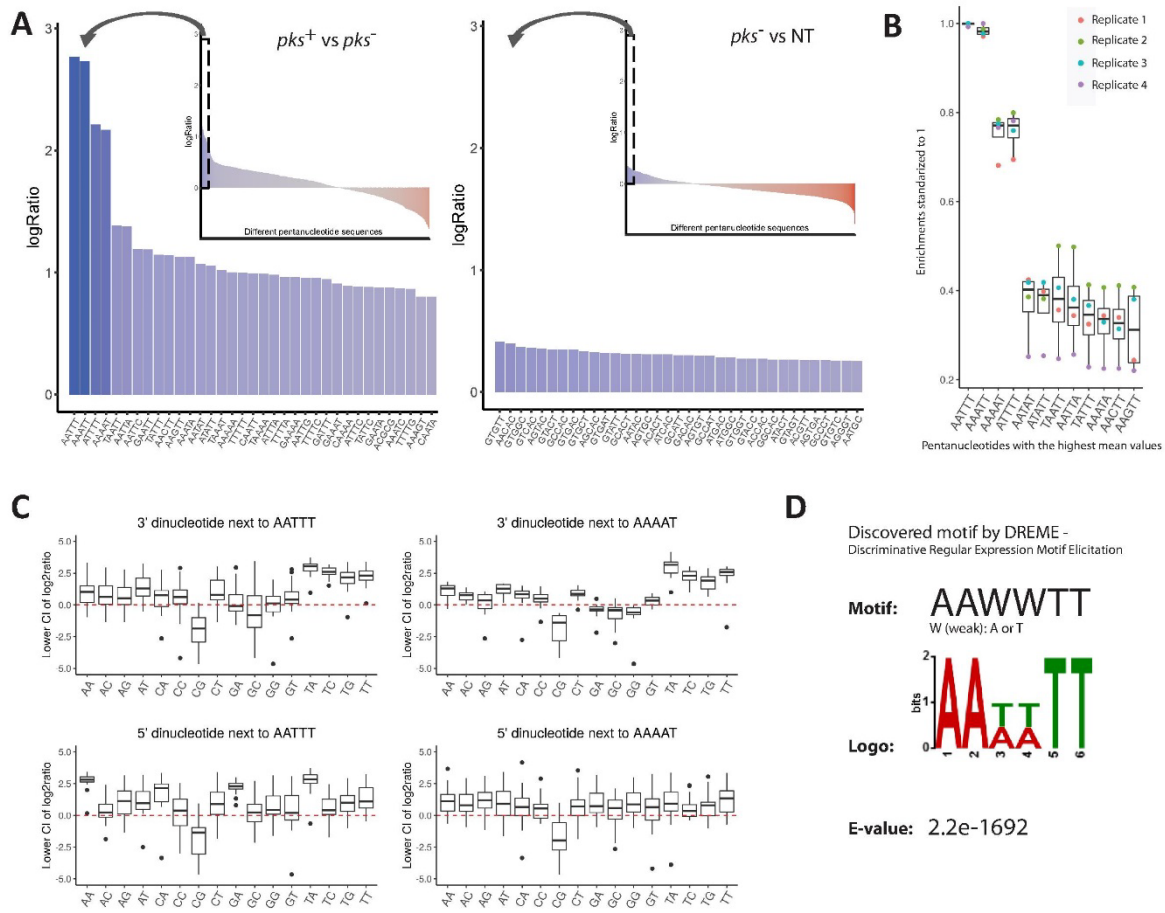

698

699 **Fig. 2. Colibactin damages DNA preferentially in specific AT-rich motifs**

700 (A) Enrichment of pentanucleotide sequences in close proximity to DSB positions ( $\pm 3$  nt) upon  
 701 different treatments. Plots present pentanucleotide enrichment (log<sub>2</sub> ratio of proportions of DSB at  
 702 each motif between both conditions) of host breaks caused by *pks*<sup>+</sup> *E.coli* infection in comparison to  
 703 *pks*<sup>-</sup> *E.coli* infection and caused by *pks*<sup>-</sup> *E.coli* infection in comparison to breaks occurring in the non-  
 704 treated (NT) cells, respectively.

705 (B) Consistency of an outstanding enrichment of AATTT and ATTTT and their reverse and  
 706 complement sequences in colibactin induced DSBs in 4 independent biological replicates. Enrichment  
 707 log<sub>2</sub> ratios were standardized so that the highest log<sub>2</sub> ratio of each experiment was taken to be 1  
 708 and the remaining values scaled accordingly. Enrichments are shown for 11 pentanucleotides with  
 709 the highest standardized mean values. Each color refers to a different biological replicate.

710 (C) Preferred content of 5' and 3' dinucleotides next to colibactin's pentanucleotids motifs. For each  
 711 of the motifs (AATTT and AAAAT) we first determined the log<sub>2</sub> ratios for all 9nt sequences with the  
 712 motif in the central 5nt. The 95% confidence interval was computed for each log<sub>2</sub> ratio and the  
 713 distribution of the lower bound of the interval plotted for each possible 2nt sequence at the 5' or 3'  
 714 end of the central pentanucleotide.

715 (D) Top motif enriched in DSBs from *pks*<sup>+</sup> *E.coli* infected cells compared to DSBs from *pks*<sup>-</sup> infected  
 716 *E.coli* identified by Discriminative Regular Expression Motif Elicitation (DREME).

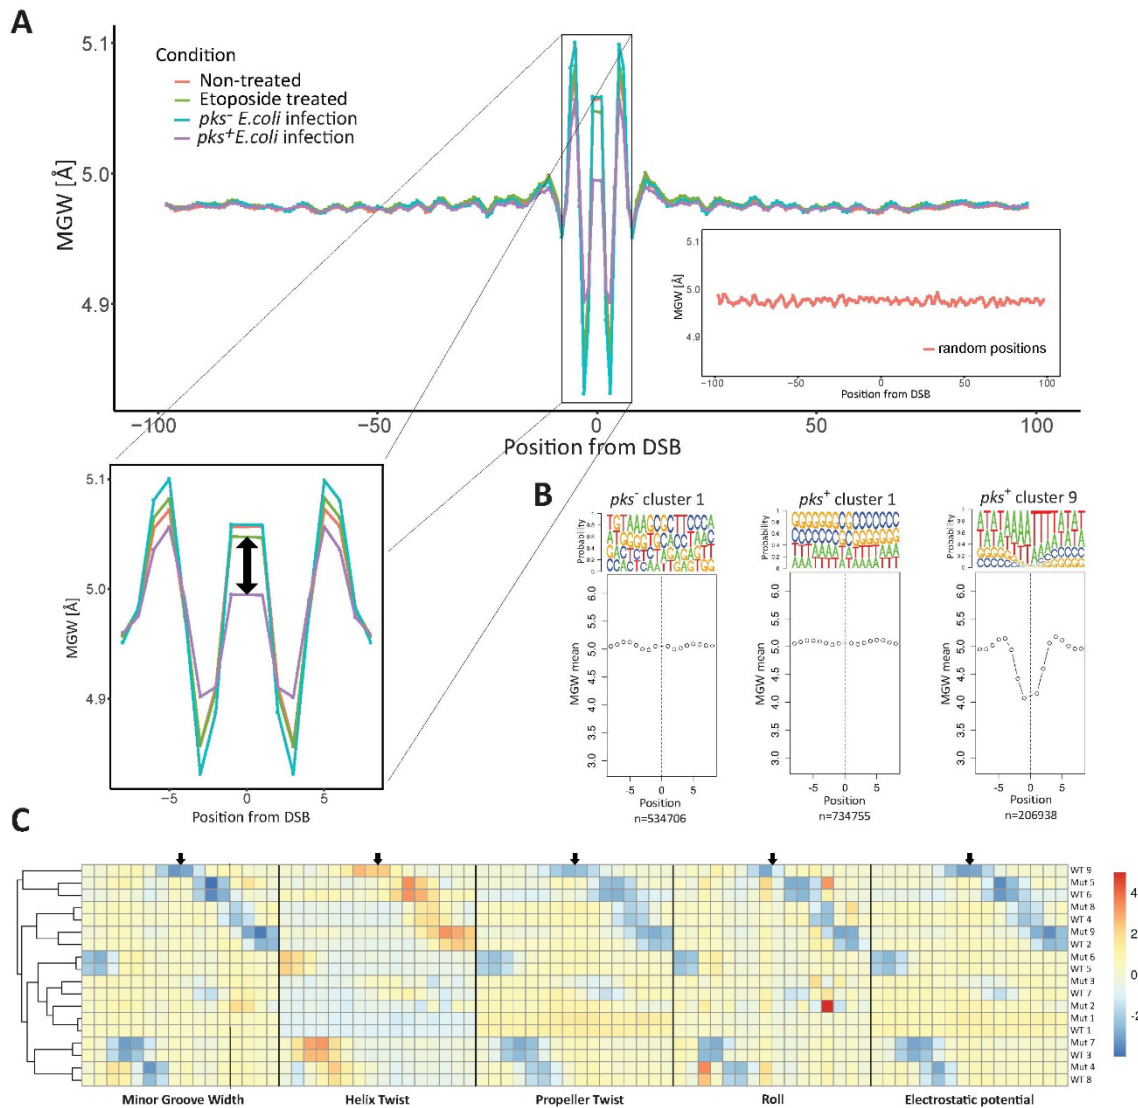

717

718 **Fig. 3. DSB caused by colibactin are associated with specific DNA shape pattern**

719 (A) Averaged minor groove width (MGW) predictions across all +/-100 bp contexts of DSBs identified  
 720 by BLISS upon different treatments. The difference in averaged profiles of MGW for DSBs between  
 721 the *pks*<sup>+</sup> *E.coli* infection condition and all other treatments is enlarged and highlighted by a black  
 722 arrow. As a control, MGW predictions of flanking sequences of 10,000 randomly chosen genomic  
 723 positions are presented in the bottom right corner.

724 (B) MGW profiles of selected clusters obtained from k-means clustering of *pks*<sup>+</sup> and *pks*<sup>-</sup> conditions.  
 725 Landscape of cluster 1 for both conditions reflects the general pattern of MGW in close proximity to  
 726 DSBs (note different y-axis scale). *pks*<sup>+</sup> cluster 9 corresponds to AT-rich sequences across identified  
 727 DSBs. Profiles of all parameters for every cluster can be found in Supplementary Fig 3A and B.

728 (C) Heatmap comparing averaged profiles of all identified clusters based on all predicted DNA shape  
 729 parameters across *pks*<sup>+</sup> and *pks*<sup>-</sup> infection conditions. Colors indicate individually Z-scored DNA  
 730 shape characteristics. Each square in the heatmap refers to specific position from the break. Black  
 731 arrows are marking exact DNA DSB position. Note that *pks*<sup>+</sup> cluster 9 is unique for this treatment and  
 732 shows extreme values centered at the DSB position.

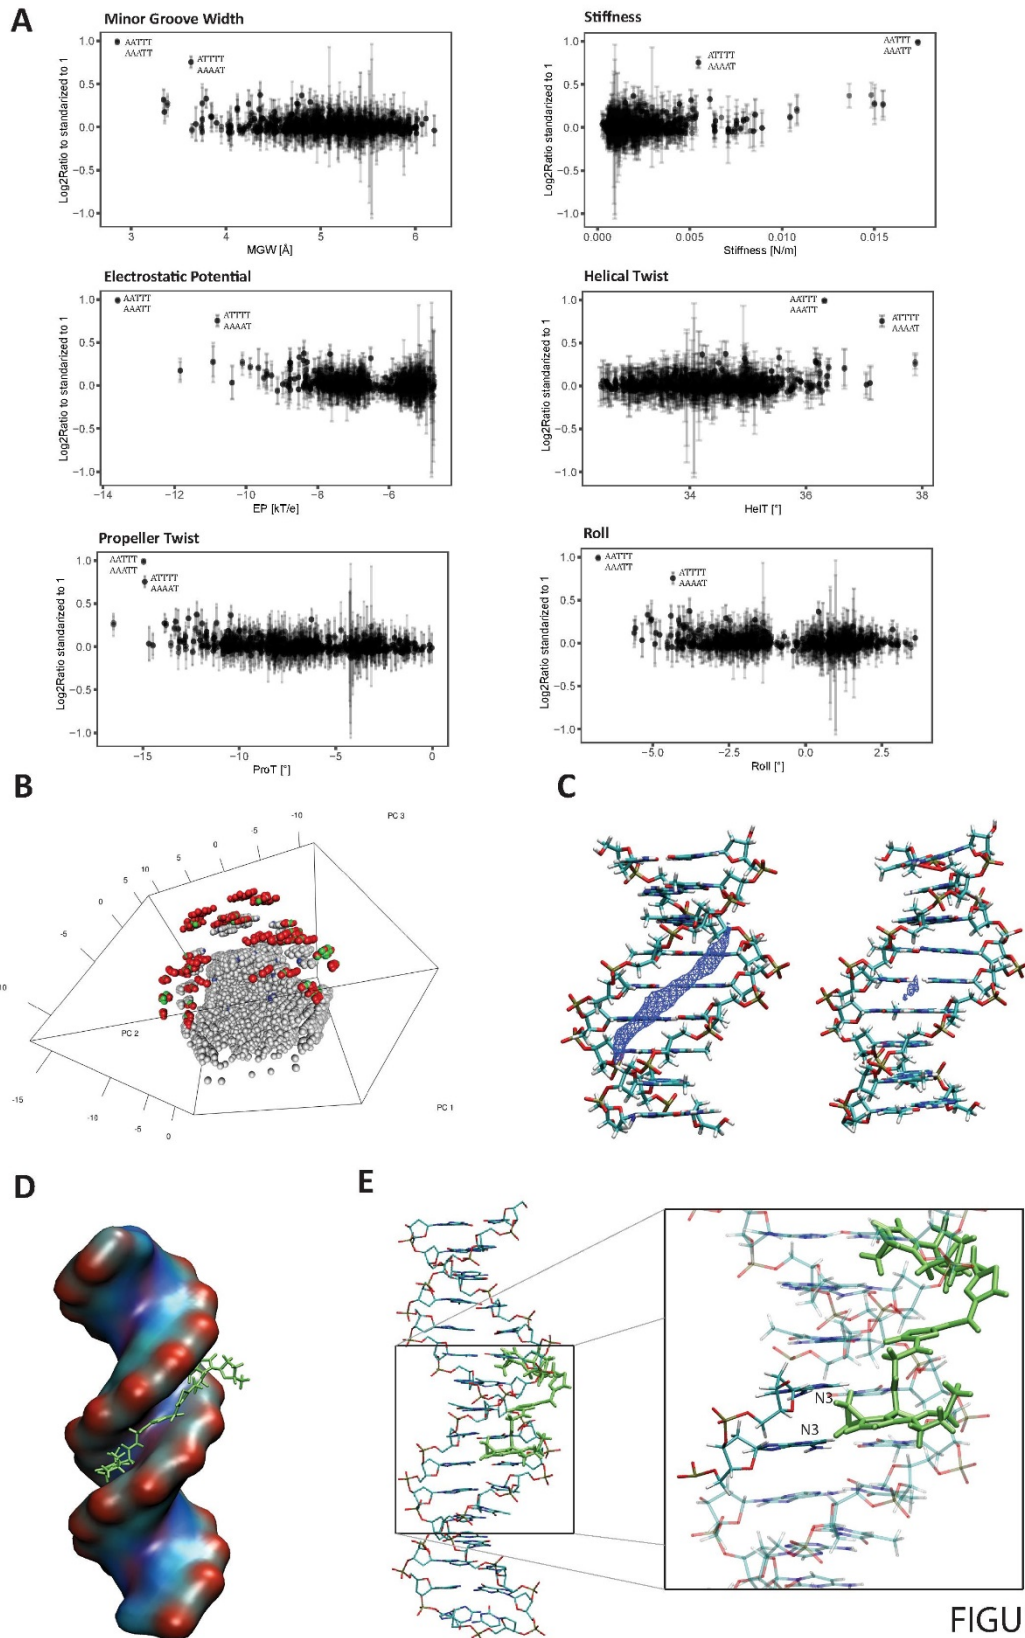

733

734 **Fig. 4. Colibactin's binding motif corresponds to extreme DNA shape parameters values and**  
735 **extreme value of electrostatic potential**

736 (A) Correlation between pentanucleotide sequence enrichments (standardized to 1; for 4 biological  
737 replicates) for colibactin's activity and values of predicted DNA shape parameters. For MGW and EP  
738 values are calculated for each pentamer; for ProT intra-base pair parameter for the central base pair  
739 of each pentamer are calculated; for Roll and HelT the average of the two inter-base pair parameters,  
740 considering the two central base pair steps in each pentamer is calculated; for Stiffness average  
741 values, considering the two central base pair steps in each pentamer are calculated.

742 (B) 3D visualization of the first 3 principal components from predicted DNA shape values for the  
743 central 5nt of all possible 9nt motifs. Those 9nt motifs containing AAWWTT and/or showing strong  
744 enrichment are highlighted. Labels: red – AAWWTT motif with lower 95% confidence interval (CI)  
745 limit of  $\log_2\text{ratio} > 1.5$ ; green – AAWWTT with lower CI limit  $< 1.5$ ; blue – non-AAWWTT sequences  
746 with lower CI limit  $> 1.5$ , grey – other sequences (proportionally downsampled to approximately  
747 35,000 sequences).

748 (C) Molecular Interaction Potential (MIP) using  $\text{Na}^+$  as probe for 2 cases, on the left the most  
749 preferred 9nt DNA sequence for colibactin binding (CAAATTTTG) and on the right the least favorite  
750 (AACTTTGCA). The isosurfaces (in blue) for the two DNA sequences show different electrostatic  
751 potential (isovalue  $= -7 \text{ kcal mol}^{-1}$ ), correlating with the different minor groove conformations.

752 (D-E) Images of the theoretical docking of predicted colibactin structure into its preferred sequence  
753 motif (central sequence AAATTT), showing the insertion of the colibactin into the minor groove, with  
754 the double stranded DNA as surface (D) and showing the atomic details (E). Enlargement shows a  
755 zoomed-in image of the closeness of the cyclopropane to one of the N3 atom of the adenine,  
756 highlighting the possibility to alkylate the consequential base pair depending on the carbon involved  
757 in the alkylation.

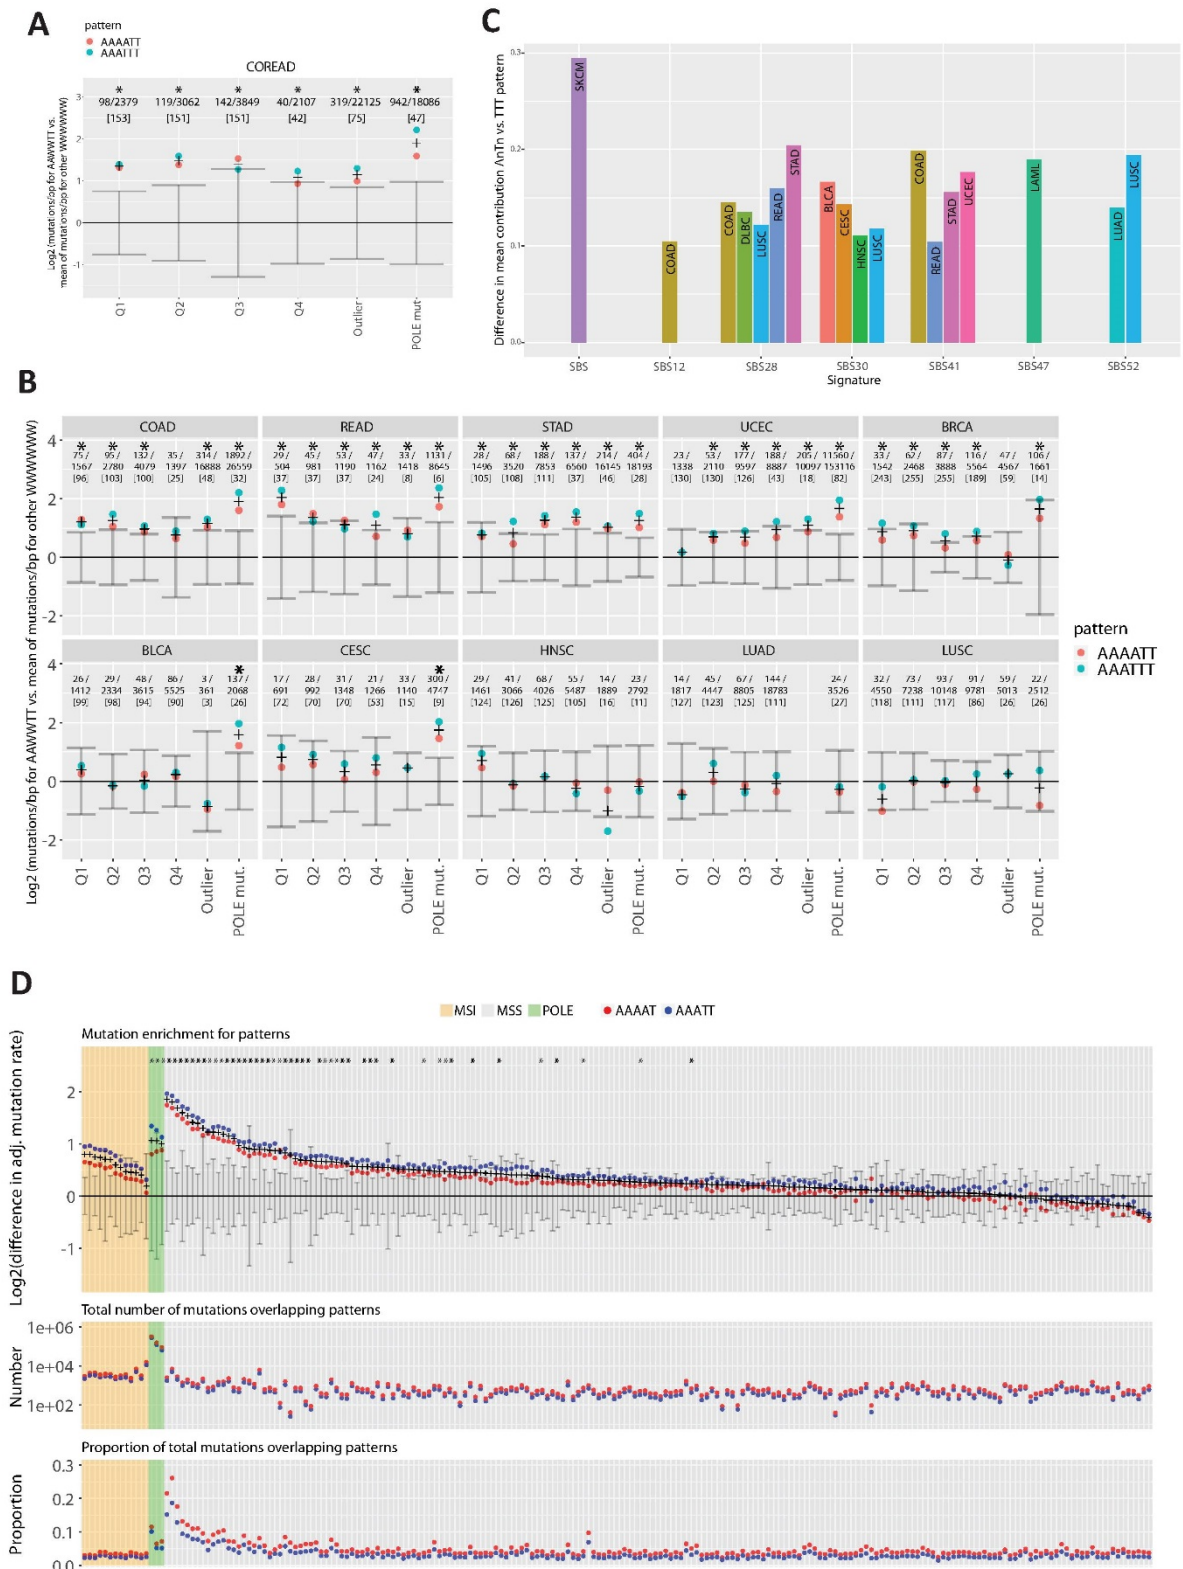

FIGURE 5

758

759 **Fig. 5. Several cancers show enrichment of mutations at colibactin associated motifs**

760 A) Enrichment of single base change (SBS) mutations at colibactin-associated hexanucleotide  
 761 motifs AAAATT/AAATTT in exome sequences from colorectal cancer cases<sup>18</sup>



762 B) Enrichment of SBS mutations at colibactin associated hexanucleotide motifs AAATTT/AAAATT  
763 in exome sequences from TCGA. Top row: cancer entities showing enrichment across all  
764 subcohorts. Bottom row: cancer entities showing enrichment only for POLE mutated cases or  
765 no enrichment at all. COAD-colon adenocarcinoma, READ-rectal adenocarcinoma, STAD-  
766 stomach adenocarcinoma, UCEC-uterine corpus endometroid cancer, BRCA-breast cancer,  
767 BLCA-bladder cancer, CESC-cervix squamous cell carcinoma, HNSC-head and neck squamous  
768 cell cancer, LUAD-lung adenocarcinoma, LUSC-lung squamous cell carcinoma  
769 C) Signature detection rates for SBS mutations with contexts overlapping AATTT/ATTTT. Only  
770 signatures with significant and positive differences in signature detection rates for contexts  
771 overlapping AATTT/ATTTT compared to TTT are shown.  
772 D) Analysis of SBS mutations at colibactin associated pentanucleotide motifs AAATT/AAAAT in  
773 whole genome somatic mutation data from <sup>19</sup>. Top: Difference in log<sub>2</sub>(mutations/bp covered  
774 by motif) between colibactin associated and all other WWWW motifs. Middle: Total  
775 mutation count at colibactin associated motifs: Bottom: Proportion of total mutations  
776 overlapping colibactin associated motifs. MSS,MSI, and POLE, mutated cases.  
777  
778 (A), (B), (D) Stars denote significant difference (Mann-Whitney-U test  $p < 0.05$  and FDR  $< 20\%$ )  
779 between colibactin associated motifs and all other motifs with the same A:T content and  
780 length (A, B: hexanucleotide (HN) motif: AAATTT/AAAATT vs WWWW motifs, C:  
781 pentanucleotide (PN) motifs: AAATT/AAAAT vs. WWWW motif). (A,B): First line is [number  
782 of mutations overlapping AAWWTT motif] / [all mutations in cohort]. Third lines is number of  
783 samples in cohort. Error bars describe the  $\pm 2$ MAD intervals for mutation rate (mutations/bp  
784 covered by motif) of WWWW(W) motifs excluding colbactin associated pattern after  
785 subtracting their mean. Dots represent the mutation rates for the two colibactin associated  
786 PN or HN motifs after subtracting the mean of the WWWW(W) motifs. Crosses are the  
787 mean of the colibactin associated motifs.

1 **Supplementary Materials**

2

3 **Supplementary Figure Legends:**

4

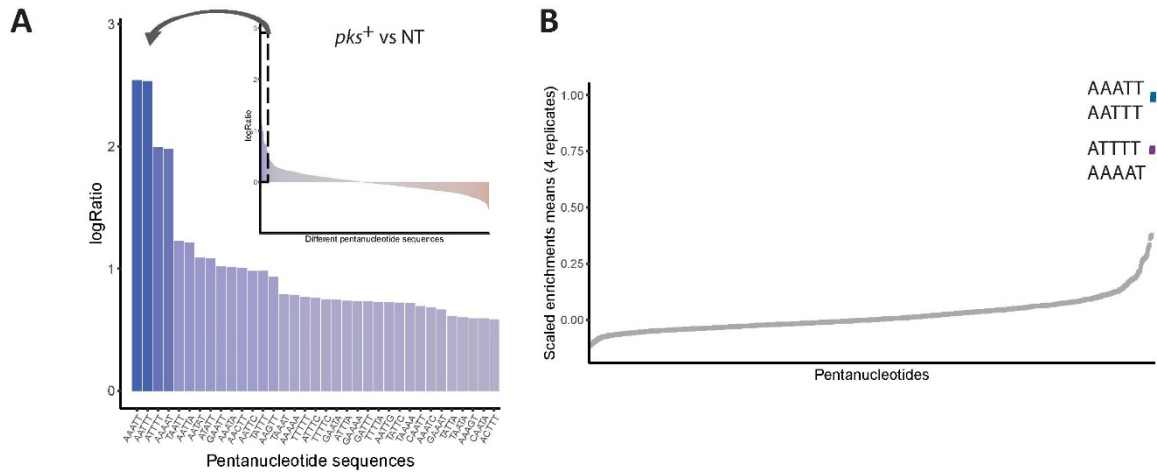

5

6 **Fig. S1. Outstanding enrichment of AAATT and ATTTT and their reverse and complement sequences**  
7 **in colibactin-induced DSBs.**

8 (A) Pentanucleotide sequences enriched (log<sub>2</sub> ratio of proportions of DSB at each motif between  
9 both conditions) at the DSB positions caused by colibactin-positive E.coli (*pks*<sup>+</sup>) in comparison to non-  
10 treated (NT) cells.

11 (B) Scaled enrichment means of all 4 independent biological replicates for all possible  
12 pentanucleotides (1,024) obtained by comparing nucleotide content of *pks*<sup>+</sup> E.coli infection-induced  
13 breaks to the *pks*<sup>-</sup> E.coli-induced breaks.

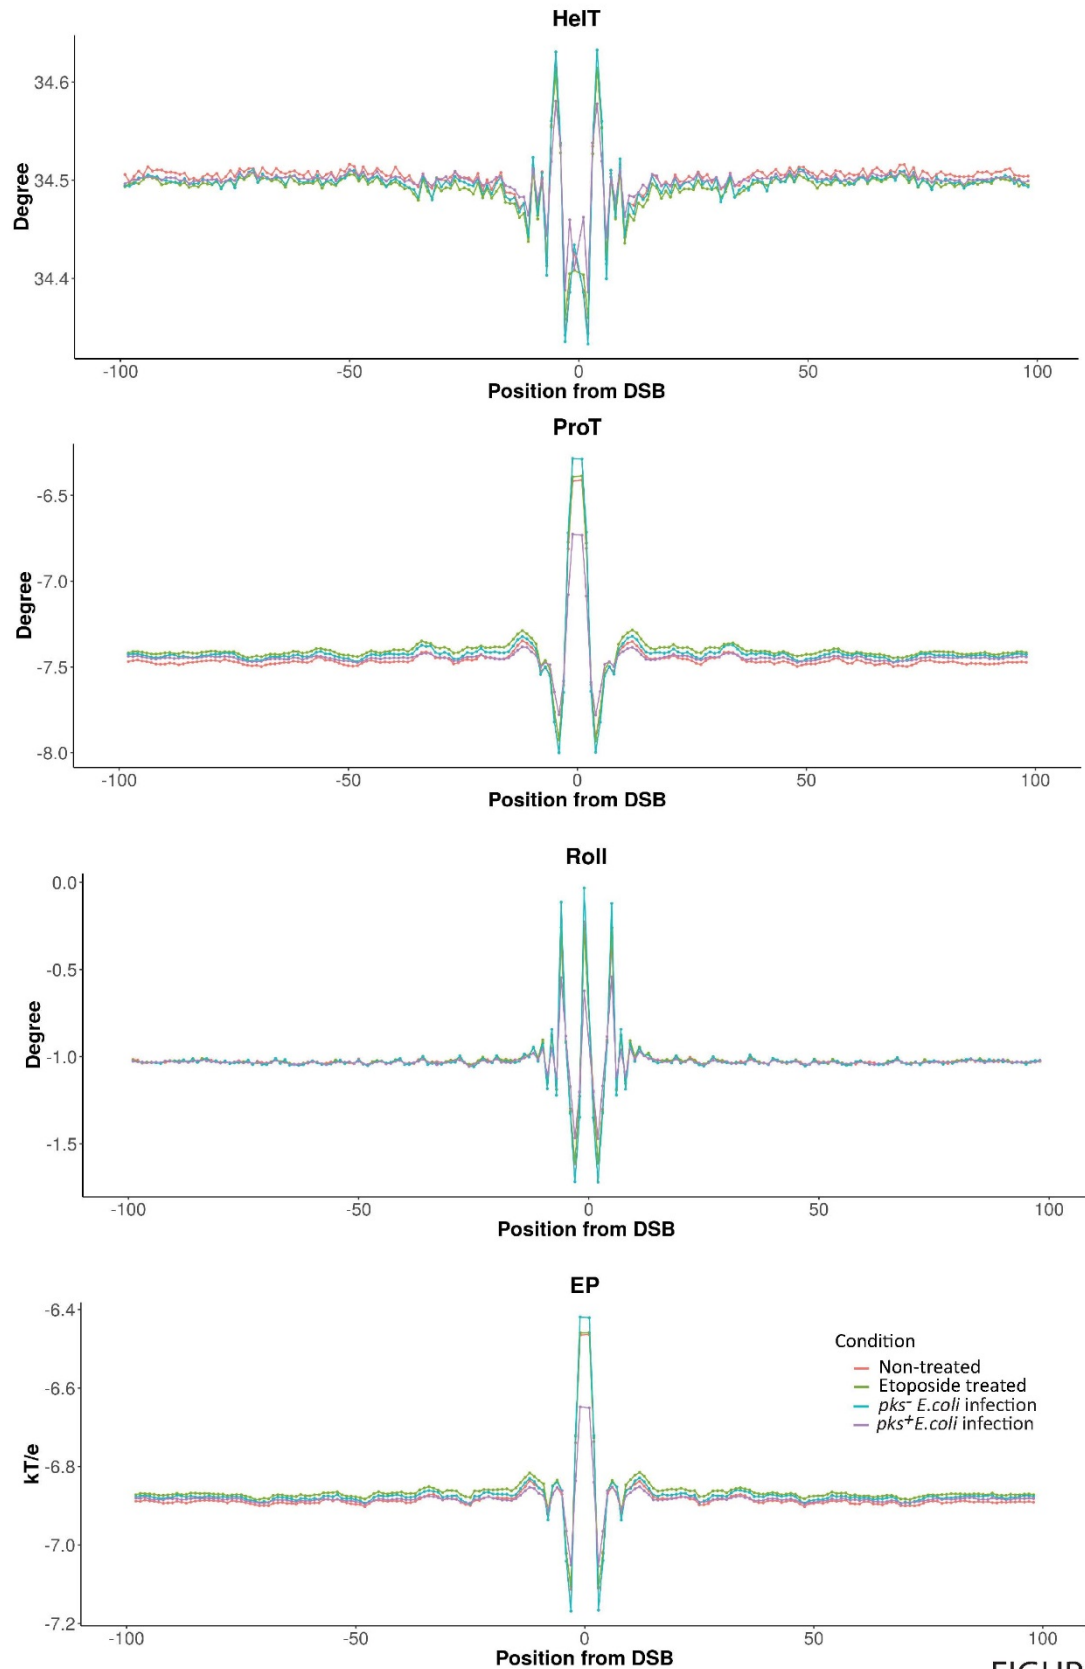

FIGURE S2

14

15 **Fig. S2. Averaged values of DNA shape properties (HelT, ProT, Roll and EP) for sequences in**  
16 **proximity to identified DSBs of non-treated, etoposide-treated, *pks*<sup>-</sup> *E.coli* infected and *pks*<sup>+</sup> *E.coli***  
17 **infected cells.**

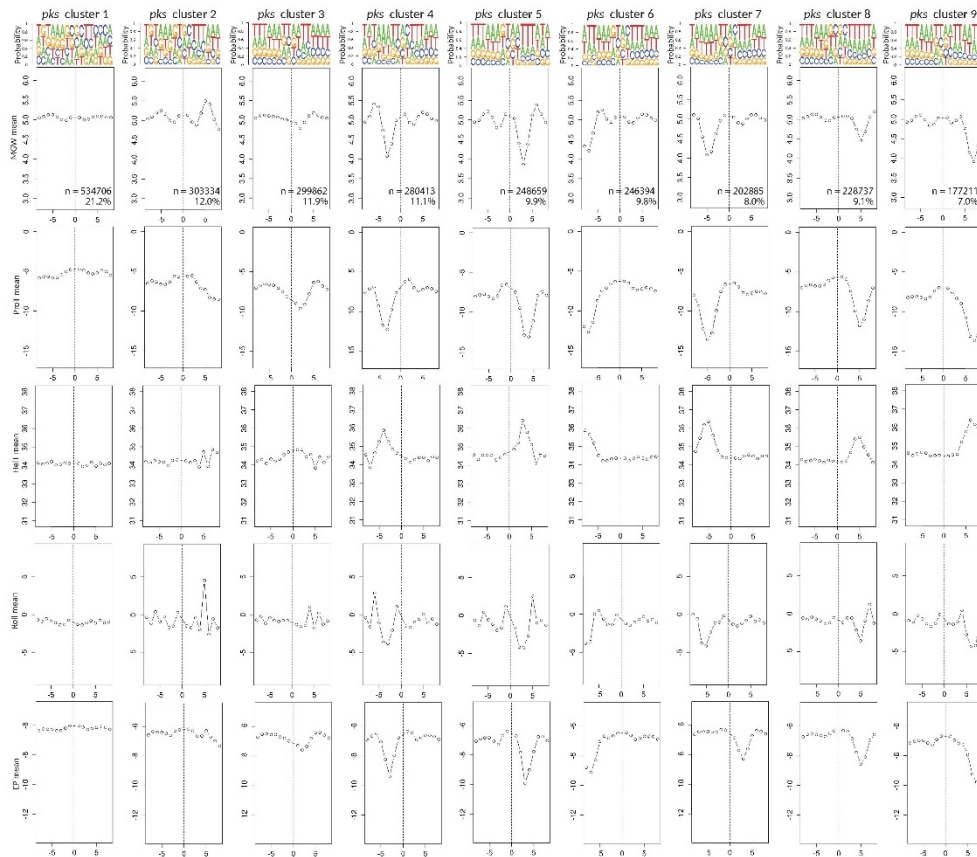

18

FIGURE S3a

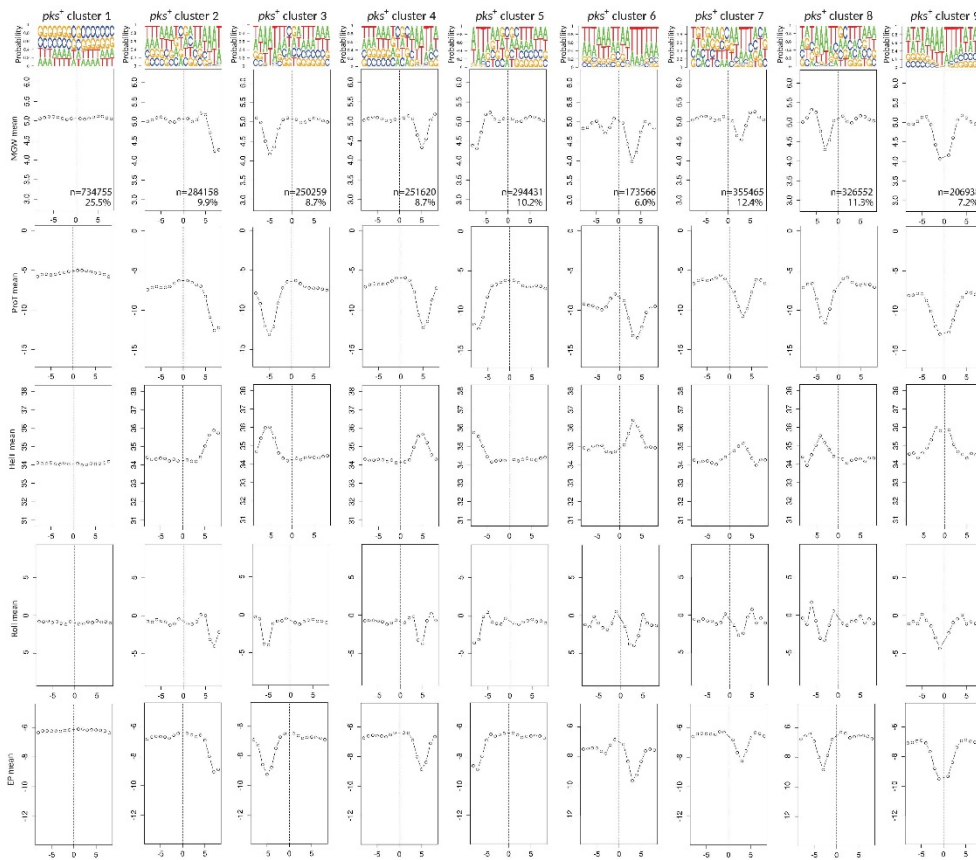

19

FIGURE S3b

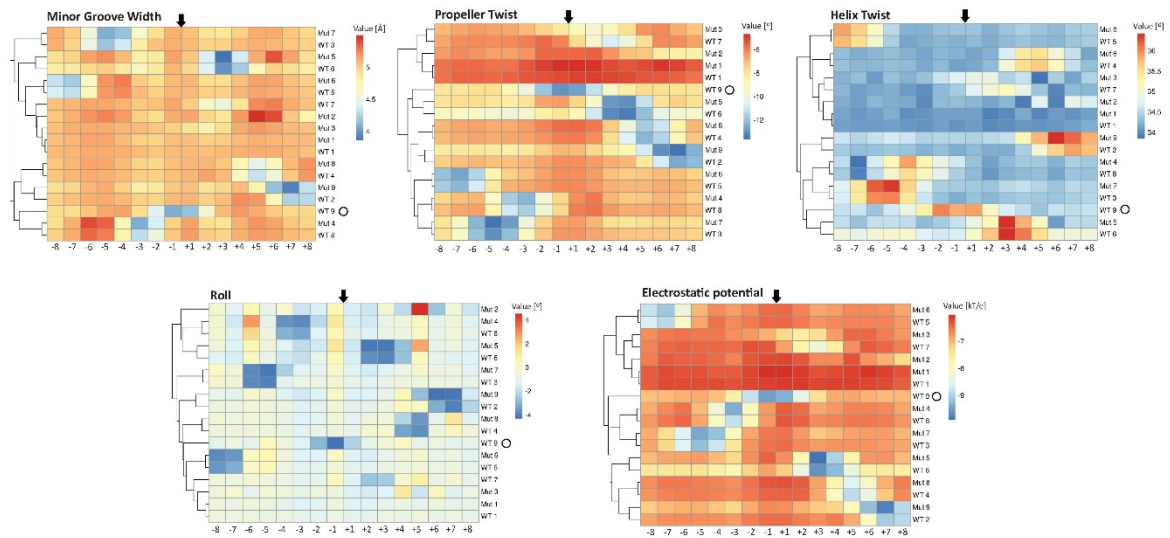

FIGURE S3c

20

21 **Fig. S3. K-means clustering of all predicted values of the DNA shape parameters.**

22 (A-B) DNA shape profiles of all clusters obtained from k-means clustering of pks+ and pks- conditions.  
23 (A) Clusters identified from the pks- dataset. (B) Clusters identified from the pks+ dataset. Above  
24 each cluster nucleotide probability for every position is presented.

25 (C) Heatmaps comparing averaged profiles of all identified clusters in pks+ and pks- conditions based  
26 on predicted DNA shape parameters, presented as individual comparisons of averaged profiles for  
27 each DNA shape parameter. Colors indicate absolute values for each DNA shape characteristics. Each  
28 square in the heatmap refers to specific position from the break. Black arrows are marking exact DNA  
29 DSB position.

30

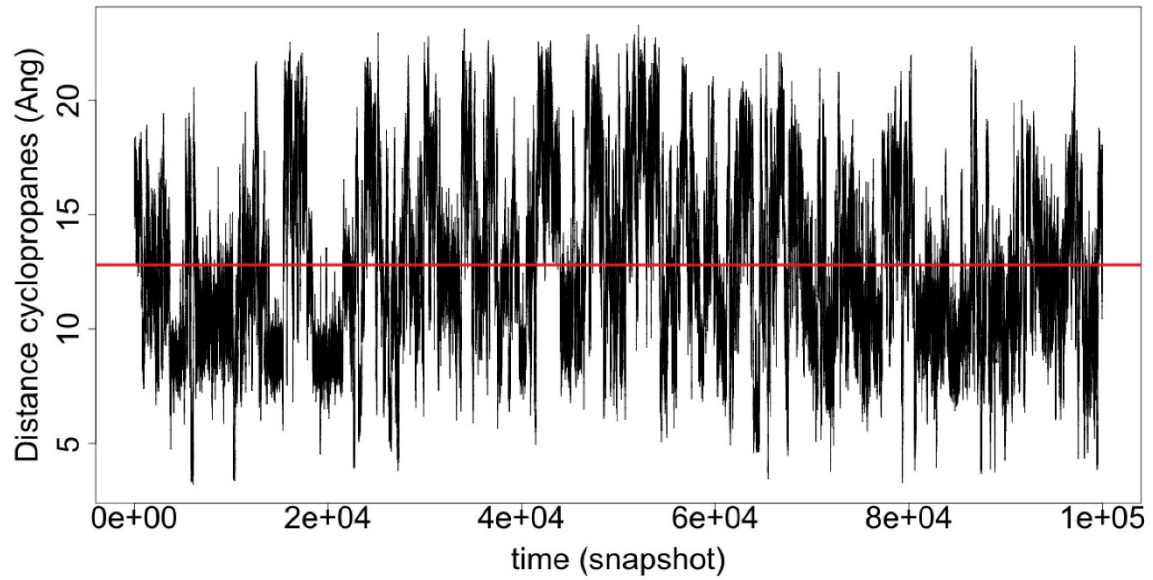

31

32 **Fig. S4. Distance of the cyclopropanes ( $\text{\AA}$ ) along the MD simulation of the free colibactin in water.**  
33 **Red line identifies the average values of this distance (12.8 $\text{\AA}$ ).**

34

35 **Table S1** Summary of DSB enrichment at all 1024 pentanucleotide patterns across 4 replicates with  
36 associated predicted central DNA shape characteristics corresponding to Fig. 2A/B and Fig. 4A

37
